# Supplementary material for: How Many Kinds of Birds Are There and Why Does It Matter?
Source: PLoS One. 2016 Nov 23;11(11):e0166307. doi: 10.1371/journal.pone.0166307 (PMC5120813; doi:10.1371/journal.pone.0166307)
Supplement: S1 Table — The number of phylogenetic species estimated in this study, and the number of subspecies recognized by Paynter [8]. (XLSX) [file pone.0166307.s002.xlsx]

## Sheet: Sheet1
S1Table. The biological species sampled in the morphological study. The number of phylogenetic species estimated in this study, and the number of subspecies recognized by Peters (1987).
Gavia immer	1	1
Pterodroma lessonii	1	1
Bulweria fallax	1	1
Oceanodroma tristrami	1	1
Eudyptes sclateri	1	1
Phalacrocorax carunculatus	3	3
Phalacrocorax niger	1	1
Ardea imperialis	1	1
Gorsachius melanolophus	1	1
Chauna chavaria	1	1
Haliaeetus leucogaster	1	1
Accipiter princeps	1	1
Buteo ridgwayi	1	1
Buteo buteo	3	11
Aquila rapax	3	5
Penelopina nigra	1	1
Tetraogallus caspius	1	2
Francolinus swainsonii	1	1
Francolinus swierstrai	1	1
Polyplectron bicalcaratum	3	5
Bonasa sewerzowi	1	1
Turnix tanki	1	2
Rallicula forbesi	2	3
Neotis heuglinii	1	1
Eupodotis caerulescens	1	1
Esacus magnirostris	1	1
Vanellus leucurus	1	1
Charadrius mongolus	2	2
Philamachus pugnax	1	1
Limnodromus griseus	3	1
Scolopax rusticola	2	2
Larus brunnicephalus	1	1
Pagophila eburnea	1	1
Chlidonias albistriata	1	1
Aethia pygmaea	1	1
Pterocles alchata	2	2
Pterocles orientalis	1	3
Columba rupestris	1	2
Columba albinucha	1	1
Columbina passerina	11	18
Leptotila rufaxilla	4	7
Geotrygon veraguensis	1	1
Goura cristata	1	2
Ptilinopus insularis	1	1
Ducula mindorensis	1	1
Ducula aenea	5	14
Chalcopsitta atra	2	2
Vini stepheni	1	1
Neopsittacus musschenbroekii	1	2
Psephotus chrysopterygius	2	2
Psittacella madaraszi	1	1
Tanygnathus gramineus	1	1
Prosopeia tabuensis	4	4
Poicephalus gulielmi	1	5
Loriculus beryllinus	1	1
Loriculus galgulus	1	2
Pyrrhura hoffmanni	1	2
Brotogeris pyrrhopterus	1	1
Phaenicophaeus diardi	1	2
Tauraco corythaix	10	5
Tyto delicatula	1	1
Uropsalis lyra	1	2
Aegotheles cristatus	4	4
Hemiprocne comata	2	4
Mearnsia novaeguineae	2	3
Aerodramus fuciphaga	1	4
Phaethornis gounellei	1	1
Campylopterus largipennis	1	3
Campylopterus ensipennis	1	1
Eulampis jugularis	1	1
Discosura conversii	1	1
Urosticte benjamini	3	3
Sternoclyta cyanopectus	1	1
Ramphomicron dorsale	1	1
Heliothryx aurita	3	4
Eulidia yarrellii	1	1
Harpactes oreskios	2	5
Merops viridis	2	2
Alcyone websteri	1	1
Dacelo tyro	2	2
Galbula cyanicollis	1	1
Pogoniulus subsulphureus	2	3
Aulacorhynchus derbianus	3	4
Selenidera reinwardtii	2	2
Prodotiscus insignis	1	4
Dendropicos gabonensis	2	3
Picus flavinucha	5	9
Leptasthenura platensis	1	1
Synallaxis poliophrys	0	1
Margarornis rubiginosus	2	2
Thripadectes ignobilis	1	1
Thamnophilus doliatus	11	17
Thamnophilus punctatus	10	12
Cercomacra ferdinandi	1	1
Rhopornis ardesiaca	1	1
Conopophaga melanops	1	2
Scytalopus psychopompus	1	0
Phylloscartes virescens	1	1
Euscarthmus rufomarginatus	1	2
Tyranniscus burmeisteri	3	6
Suiriri suiriri	2	3
Muscisaxicola juninensis	1	1
Gubernetes yetapa	1	1
Ramphotrigon megacephala	1	4
Myiarchus oberi	3	4
Myiodynastes bairdii	1	1
Cotinga ridgwayi	1	1
Cephalopterus ornatus	1	1
Atrichornis clamosus	1	1
Dicrurus leucocphaeus	10	14
Parus melanolophus	1	1
Sylviparus modestus	1	3
Climacteris erythrops	1	2
Climacteris picumnus	2	2
Coracina cinerea	3	3
Campephaga lobata	2	2
Pycnonotus goiavier	3	6
Pycnonotus latirostris	3	4
Chloropsis aurifrons	2	7
Thryothorus sinaloa	1	3
Cettia fortipes	1	3
Bradypterus victorini	1	1
Locustella fasciolata	1	1
Cisticola erythrops	2	7
Cisticola cinereola	1	1
Phylloscopus cebuensis	2	3
Sylvia curruca	3	10
Regulus satrapa	1	6
Rhinomyias gularis	2	2
Ficedula platenae	1	1
Acanthiza inornata	1	2
Acanthiza nana	1	3
Gerygone olivacea	2	3
Gerygone ruficauda	0	1
Gerygone tenebrosa	1	3
Clytorhynchus vitiensis	10	12
Monarcha brehmii	1	1
Myiagra oceanica	4	4
Rhipidura aureola	2	3
Rhagologus leucostigma	1	3
Luscinia komadori	2	3
Luscinia pectoralis	1	1
Copsychus albospecularis	3	3
Saxicola gutturalis	1	2
Turdus grayi	1	6
Spelaeornis chocolatinus	2	4
Stachyris rufifrons	1	5
Turdoides nipalensis	1	1
Babax lanceolatus	2	3
Garrulax perspicillatus	1	1
Lioptilus nigricapillus	1	1
Paradoxornis nipalensis	6	12
Margarops fusca	1	1
Motacilla madaraspatensis	1	1
Anthus melindae	1	1
Telophorus nigrifrons	3	3
Aplonis metallica	4	5
Saroglossa spiloptera	1	1
Sturnus sturninus	1	1
Meliphaga inexpectata	1	1
Meliphaga plumula	1	3
Pycnopygius stictocephalus	1	1
Moho apicalis	1	1
Chaetoptila angustipluma	1	1
Dicaeum cruentatum	3	6
Anthreptes pallidigaster	1	1
Arachnothera clarae	2	3
Vireo bellii	2	4
Hylophilus hypoxanthus	4	5
Parula gutturalis	1	1
Dendroica coronata	4	4
Dendroica palmarum	2	2
Myioborus miniatus	4	12
Tangara cyanicollis	6	7
Tangara callophrys	1	1
Euphonia trinitatis	1	1
Euphonia concinna	1	1
Anisognathus lacrymosus	7	9
Heterospingus xanthopygius	2	3
Chlorospingus parvirostris	1	3
Cyanocompsa brissonii	5	5
Melozone leucotis	2	3
Trichothraupis melanops	1	1
Melopyrrha nigra	2	2
Diglossa cyanea	4	5
Melanodera melanodera	2	2
Agelaius phoeniceus	3	23
Carpodacus pulcherrimus	2	4
Carpodacus rhodochlamys	2	3
Serinus canaria	1	1
Drepanis pacifica	1	1
Spermophaga haematina	2	3
Emblema guttata	1	1
Oreostruthus fuliginosus	2	3
Erythrura prasina	2	2
Erythrura trichroa	3	10
Lonchura striata	4	6
Lonchura nevermanni	1	1
Padda fuscata	1	1
Vidua chalybeata	6	5
