# Supplementary material for: How Many Kinds of Birds Are There and Why Does It Matter?
Source: PLoS One. 2016 Nov 23;11(11):e0166307. doi: 10.1371/journal.pone.0166307 (PMC5120813; doi:10.1371/journal.pone.0166307)
Supplement: S2 Table — Number of phylogroups per species as determined by mtDNA sequence data, mid-latitude range estimates, and range sizes. Unless indicated otherwise, taxa occupying small (< 150,000 square miles) and contiguous ranges were assumed to have no genetic structure. (XLSX) [file pone.0166307.s003.xlsx]

## Sheet: Sheet1
taxon 1	n	New World phylogroups	max and min	mid latitude	range latitude	range size - km2
Adelomyia melanogenys	160	9	10/ (25)	-7.5	35	620000	Chaves, unpublished data
Agelaius phoeniceus	137	3	68/12	40	56	13700000	Ball et al., 1988. PNAS 85:1558-1562 /Barker et al. 2008 AUK 125:87-94
Amaurospiza moesta	3	2	(10)/(30)	-20	20	605000	Bryson, et al. 2013. J. of Biogeo. 41:587-599
Amazilia tzacatl	99	5	20/(4)	8	24	1030000	Miller et al. 2011. The Auk 113:806-813
Amazona auropalliata	2	1	17/9	13.5	8	90800	Ribas et al. 2007. Ibis 149:564-574
Amazona ochrocephala & aestiva (rampant gene flow)	40	6	11/(33)	-11	44	10850000	Ribas et al. 2007. Ibis 149:564-574
Amazona oratrix	18	3	25/16	20.5	9	45400	Ribas et al. 2007. Ibis 149:564-574
Aphelocoma insularis	3	1	34.2/33.8	34	0.2	250	McCormack et al., 2011. Evolution 65:184-202
Aphelocoma californica	31	3	46/17	31.5	29	2320000	McCormack et al., 2011. Evolution 65:184-202
Aphelocoma coerulescens	3	1	30/26.4	28.2	3.6	6900	McCormack et al., 2011. Evolution 65:184-202
Aphelocoma ultramarina	25	5	34/19	26.5	15	572000	McCormack et al., 2011. Evolution 65:184-202
Aphelocoma unicolor	13	4	22/14	18	8	148000	McCormack et al., 2011. Evolution 65:184-202
Aratinga auricapillus	7	1	(10)/(28)	-19	18	67100	Ribas and Miyaki, 2004. MP&E 30:663-675
Aratinga jandaya	5	1	(1)/(9)	-5	8	1510000	Ribas and Miyaki, 2004. MP&E 30:663-675
Aratinga solstitialis	4	1	8/(3)	2.5	11	65300	Ribas and Miyaki, 2004. MP&E 30:663-675
Aratinga wesddellii	4	1	(1)/(16)	-8.5	15	2260	Ribas and Miyaki, 2004. MP&E 30:663-675
Arremon abeillei	6	2	(1)/(8)	-4.5	7	61000	Cadena et al. 2007. MP&E 44:993-1016
Arremon atricapillus	8	1	(5)/6	0.5	11	xxx	Cadena et al. 2007. MP&E 44:993-1016
Arremon aurantiirostris	31	5	17/(9)	4	26	694000	Cadena et al. 2007. MP&E 44:993-1016
Arremon brunneinucha	125	11	22/(15)	3.5	37	617000	Cadena et al. 2007. MP&E 44:993-1016
Arremon castaneicepes	2	1	8/(13)	-2.5	21	68800	Cadena et al. 2007. MP&E 44:993-1016
Arremon crassirostris	1	1	2016-08-09	8.5	1	9500	Cadena et al. 2007. MP&E 44:993-1016
Arremon flavirostris	11	2	(15)/(28)	-21.5	13	2100000	Cadena et al. 2007. MP&E 44:993-1016
Arremon taciturnus	28	5	9/(30)	-10.5	39	7074000	Cadena et al. 2007. MP&E 44:993-1016
Arremon torquatus	69	13	10.5/(23)	-6.25	33.5	450000	Cadena et al. 2007. MP&E 44:993-1016
Arremon virenticeps	10	3	23/18	20.5	5	79000	Cadena et al. 2007. MP&E 44:993-1016
Aspatha gularis	3	1	17/14	15.5	3	99100	Witt, unpub. Diss.
Atlapetes albiceps	2	1	(4)/(6)	-5	2	26300	Cadena et al., unpublished data
Atlapetes albinucha	7	1	17/23	20	6	xxx	Cadena et al., unpublished data
Atlapetes albofrenatus	5	2	2016-09-03	6	6	44400	Cadena et al., unpublished data
Atlapetes citrinellus	2	1	(23)/(25)	-24	2	13500	Cadena et al., unpublished data
Atlapetes flaviceps	1	1	5	5	1	230	Cadena et al., unpublished data
Atlapetes fulviceps	2	1	(16)/(26)	-21	10	77600	Cadena et al., unpublished data
Atlapetes fuscoolivaceus	2	1	2016-01-02	1.5	1	1200	Cadena et al., unpublished data
Atlapetes gutturalis	4	2	2016-01-11	6	10	xxx	Cadena et al., unpublished data
Atlapetes leucopis	2	1	3/(2)	0.5	5	12100	Cadena et al., unpublished data
Atlapetes leucopterus	3	2	0/(6)	-3	6	65200	Cadena et al., unpublished data
Atlapetes melanocephalus	2	1	2016-10-11	10.5	1	4000	Cadena et al., unpublished data
Atlapetes nationi	3	2	(8)/(15)	-6.5	7	33100	Cadena et al., unpublished data
Atlapetes pallidiceps	1	1	2)	-2	1	1	Cadena et al., unpublished data
Atlapetes pallidinucha	7	2	6/(13)	-3.5	19	98000	Cadena et al., unpublished data
Atlapetes personatus	6	3	2016-06-01	3.5	5	101000	Cadena et al., unpublished data
Atlapetes pileatus	6	2	27/16	21.5	11	349000	Cadena et al., unpublished data
Atlapetes rufigenis [inc. forbesi]	4	2	(6)/(14)	-10	8	39500	Cadena et al., unpublished data
Atlapetes rufinucha [inc. latinuchus]	26	9	10/(18)	-4	28	278000	Cadena et al., unpublished data
Atlapetes schistaceus [inc. canigenis]	9	5	10/(11)	-0.5	21	196200	Cadena et al., unpublished data
Atlapetes seebohmi	2	1	(3)/(11)	-7	8	45000	Cadena et al., unpublished data
Atlapetes semirufus	16	4	2016-10-04	7	6	67800	Cadena et al., unpublished data
Atlapetes tricolor	12	2	(1)/(15)	-8	14	73000	Cadena et al., unpublished data
Attila spadiceus	~77	4	27/(17)	5	44	7240000	Burney, unpub. Diss; Burney and Brumfield 2009. Am. Nat. 174:358-368
Auriparus flaviceps	45	2	37.5/20	28.75	17.5	1750000	Zink et al., 2001. Condor 103:1-10
Automolus ochrolaemus	~103	7	19/(18)	0.5	37	6430000	Burney, unpub. Diss; Burney and Brumfield 2009. Am. Nat. 174:358-368
Baeolophus inornatus (griseus + ridgwayi)	525	2	43/23	33	20	1234000	Cicero, 1996. Univ. Cal. Publ. Zool. 128:1-217
Baryphthengus martii (+ ruficapillus)	18	7	14/(30)	-8	44	4000000	Witt, unpub. Diss.
Basileuterus belli	61	5	25/14	18.5	11	334000	Klicka et al., unpublished data
Basileuterus tristriatus	196	10	10/(18)	4	28	467000	Gutierrez-Pinto et al.2012. MP&E 64:156-165
Brachygalba goeringi	1	1	2016-10-07	8.5	3	134000	Witt, unpub. Diss.
Brachygalba salmoni	1	1	7.5/10.5	9	3	50800	Witt, unpub. Diss.
Branta canadensis (+ hutchinsii)	236	2	71/38	54.5	33	13940000	Scribner et al. 2003. Auk 120:889-907
Brotogeris chiriri	5	1	(3)/(28)	-15.5	25	3800000	Ribas et al., 2009. J. Biogeo. 36:1712-1729
Brotogeris chrysopterus	19	1	11/(13)	-1	24	3110000	Ribas et al., 2009. J. Biogeo. 36:1712-1729
Brotogeris cyanoptera	10	2	7/(18)	-5.5	25	2570000	Ribas et al., 2009. J. Biogeo. 36:1712-1729
Brotogeris jugularis	8	1	16/3	9.5	13	781, 000	Ribas et al., 2009. J. Biogeo. 36:1712-1729
Brotogeris pyrrhopterus	6	1	0/(5)	-5	5	9300	Ribas et al., 2009. J. Biogeo. 36:1712-1729
Brotogeris sanctithomae	8	1	0/(15)	-7.5	15	1710000	Ribas et al., 2009. J. Biogeo. 36:1712-1729
Brotogeris tirica	2	1	(5)/(30)	-17.5	25	294000	Ribas et al., 2009. J. Biogeo. 36:1712-1729
Brotogeris versicolurus	5	1	5/(10)	-2.5	15	636000	Ribas et al., 2009. J. Biogeo. 36:1712-1729
Bucco [Agricus] macrodactylus	4	2	8/(16)	-4	20	3300000	Witt, unpub. Diss.
Bucco [Nyctastes] noanamae	1	1	2016-09-04	6.5	5	29500	Witt, unpub. Diss.
Bucco [Nyctastes] tamatia	7	3	7/(18)	-5.5	25	4350000	Witt, unpub. Diss.
Buteo lineatus	112	2	47/25	36	22	3540000	Hull et al., 2008. MP&E 49:988-996
Cacicus chrysonotus	3	3	8/(18)	-5	26	83600	Price and Lanyon. 2004. Behavioral Ecol. 15:485-497
Cacicus chrysopterus	3	1	(15)/(35)	-25	20	1740000	Price and Lanyon. 2004. Behavioral Ecol. 15:485-497
Campylorhynchus brunneicapillus	60	2	38/19	28.5	19	1850000	Zink et al., 2001. Condor 103:1-10
Campylorhynchus rufinucha	128	5	19/10	14.5	9	219000	Vazquez-Miranda et al. 2009. Auk 126:765-778
Cyanoloxia glaucocaerulea	2	1	(23)/(37)	-30	14	684000	Bryson, et al. 2013. J. of Biogeo. 41:587-599
Capito niger [inc. auratus]	21	4	8/(18)	-5	26	4230000	Armenta et al. 2005. Condor 107:527-536
Catharus aurantiirostris	33	4	30/0.0	15	30	646000	Klicka et al., unpublished data
Catharus bicknelli	2	1	50.5/42	46.25	8.5	5800	Klicka et al., unpublished data
Catharus dryas	21	2	17/(25)	-4	42	466000	Klicka et al., unpublished data
Catharus frantzii	20	3	21.5/9	15.25	12.5	245000	Klicka et al., unpublished data
Catharus fuscater	26	4	11.5/(18)	-3.25	29.5	260000	Klicka et al., unpublished data
Catharus fuscescens	4	1	56/35	45.5	21	588000	Klicka et al., unpublished data
Catharus gracilirostris	6	1	10/8.5	9.25	1.5	3800	Klicka et al., unpublished data
Catharus guttatus	22	2	62.5/32.5	47.5	30	4710000	Klicka et al., unpublished data
Catharus mexicanus	5	2	23.5/8.5	16	15	125000	Klicka et al., unpublished data
Catharus minimus	4	1	71/47	59	24	4170000	Klicka et al., unpublished data
Catharus occidentalis	35	1	30/16	23	14	414000	Klicka et al., unpublished data
Catharus ustulatus	8	2	65/33	49	32	2890000	Klicka et al., unpublished data
Centrocercus urophasianus	164	1	49/35	42	14	1329700	Kahn et al. 1999. Auk 116:819-824
Certhia americana	364	5	62.5/13.5	38	49	6540000	Manthey et al., 2011. Mol. Phyl. & Evol. 58:502-512
Certhiasomus [Deconychura] stictolaema	6	3	5/(11)	-3	16	2840000	Derryberry et al. 2010. Zootaxa 2416:44-50
Chamaea fasciata	61	1	46/30	38	16	246000	Burns and Barhoum. 2006. MP&E 38:117-129
Chelidoptera tenebrosa	6	1	11/(23)	-6	34	11400000	Witt, unpub. Diss.
Chrysomus icterocephalus	48	1	12/(7)	2.5	19	1580000	Cadena et al. 2011. MP&E 58:540-545
Coereba flaveola	42	8	27/(33)	-3	60	10800000	Bellemain et al., 2008. BMC Evol. Biol. 8:240
Colaptes auratus	201	1	58/13	35.5	45	15000000	Moore et al., 1991. Mole. Biol. Evol. 8:327-344
Corvus brachyrhynchus	164	1	63/25	44	38	7040000	Klicka et al., unpublished data
Corvus caurinus	89	1	61/48	54.5	13	397000	Klicka et al., unpublished data
Cyanocitta stelleri	>200	3	62.5/13.5	38	49	3460000	Klicka et al., unpublished
Cyanocompsa cyanoides	78	5	18/(18)	0	36	7480000	Bryson, et al. 2013. J. of Biogeo. 41:587-599
Cyanocompsa parellina	21	3	26/13	19.5	13	577000	Bryson, et al. 2013. J. of Biogeo. 41:587-599
Cyclarhis gujanensis	30	8	23/(36)	-6.5	59	13500000	Slager et al. 2014. Mol. Phyl. & Evol. 80:95-104
Deconychura longicauda	6	3	9/(18)	-4.5	27	5120000	Derryberry et al. 2010. Zootaxa 2416:44-50
Dendragapus obscurus (+ fuliginosus)	134	3	65/36	50.5	29	2528000	Barrowclough et al. 2004. 13:1911-1922
Dendrocincla fuliginosa	25	6	15/(30)	-7.5	45	9680000	Weir et al. PNAS 2009. 106:21737-21742 / Burney and Brumfield, 2009. Am. Nat 174:358-68
Dendrocincla homochroa	8	2	22/8	-15	14	494000	Miller, unpublished data (genbank)
Dendroica caerulea	154	1	45/37	41	8	814000	Veit et al. 2005. Cons. Genetics 6:159-174
Dendroica caerulescens	287	1	50/35	42.5	15	1150000	Grus et al., 2009. Auk 126:198-210.
Dendroica coronata	93	3	70/15	42.5	55	9920000	Mila et al. 2007, Mol. Ecol. 16:159-173
Dendroica dominica	109	1	42/28	35	14	1, 927,000	McKay, 2009. J. Avian Biol. 40:181-190
Dendroica graciae	28	1	38/15	26.5	23	1117000	Klicka et al., unpublished data
Dendroica nigrescens	11	2	53/30	41.5	23	2900000	Lovette et al., 1999. Mol. Ecol. 8:1431-1441
Dendroica occidentalis	7	1	47/36	41.5	11	336000	Lovette et al., 1999. Mol. Ecol. 8:1431-1441
Dendroica petechia	390	3	70/(3)	36.5	73	15300000	Boulet and gibbs, 2006. Mol. Ecol. 15:2505-2525
Dendroica townsendi	7	1	65/42	53.5	23	1404800	Lovette et al., 1999. Mol. Ecol. 8:1431-1441
Elaeneia albiceps	4	3	2/(55)	-27.5	57	2240000	Rheindt et al.; 2008. BMC Evol. Biol. 8:193
Elaenia cristata	4	2	10/(21)	-5.5	31	5130000	Rheindt et al.; 2008. BMC Evol. Biol. 8:193
Elaenia dayi	1	1	2016-07-03	5	4	26600	Rheindt et al.; 2008. BMC Evol. Biol. 8:193
Elaenia fallax	3	2	18/20	19	2	20300	Rheindt et al.; 2008. BMC Evol. Biol. 8:193
Elaenia flavogaster	14	3	22 / (29)	-4.5	51	10300000	Rheindt et al.; 2008. BMC Evol. Biol. 8:193
Elaenia gigas	2	1	5/(19)	-7	24	475000	Rheindt et al.; 2008. BMC Evol. Biol. 8:193
Elaenia martinica	4	2	2016-10-18	14	8	27100	Rheindt et al.; 2008. BMC Evol. Biol. 8:193
Elaenia mesoleuca	2	1	(18)/(30)	-24	12	2010000	Rheindt et al.; 2008. BMC Evol. Biol. 8:193
Elaenia obscura	6	2	(3)/(32)	-17.5	29	1790000	Rheindt et al.; 2008. BMC Evol. Biol. 8:193
Elaenia pallatangae	4	2	7/(8)	-0.5	15	473000	Rheindt et al.; 2008. BMC Evol. Biol. 8:193
Elaenia parvirostris	14	1	(15)/(37)	-26	22	2740000	Rheindt et al.; 2008. BMC Evol. Biol. 8:193
Elaenia ruficeps	4	1	4 / (2)	1	6	694000	Rheindt et al.; 2008. BMC Evol. Biol. 8:193
Elaenia spectabilis	9	2	(9)/(34)	-22.5	25	2890000	Rheindt et al.; 2008. BMC Evol. Biol. 8:193
Elaenia strepera	8	1	(6)/(26)	-10	20	231000	Rheindt et al.; 2008. BMC Evol. Biol. 8:193
Electron platyrhynchum (+ carinatum)	12	4	16/(18)	-1	34	2860000	Witt, unpub. Diss.
Empidonax affinis	19	1	30/14	22	16	480000	Klicka et al., unpublished data
Empidonax albigularis	4	1	27/9	18	18	413000	Klicka et al., unpublished data
Empidonax alnorum	4	1	53/35	44	18	7110000	Klicka et al., unpublished data
Empidonax atriceps	2	1	2016-11-08	9.5	3	3700	Klicka et al., unpublished data
Empidonax difficilis	47	3	59/31	45	28	862000	Klicka et al., unpublished data
Empidonax flavescens	10	3	17/8	12.5	9	165000	Klicka et al., unpublished data
Empidonax flaviventris	3	1	62/46	54	16	5330000	Klicka et al., unpublished data
Empidonax fulvifrons	10	1	27/13	20	14	510600	Klicka et al., unpublished data
Empidonax hammondi	21	1	65/36	50.5	29	2760000	Klicka et al., unpublished data
Empidonax minimus	6	1	65/35	47.5	30	5750000	Klicka et al., unpublished data
Empidonax oberholseri	30	1	62/36	49	26	2680000	Klicka et al., unpublished data
Empidonax occidentalis	45	2	46/16	31	30	2349000	Klicka et al., unpublished data
Empidonax traillii	8	1	53/35	44	18	7300000	Klicka et al., unpublished data
Empidonax virescens	5	1	45/29	37	16	3010000	Klicka et al., unpublished data
Empidonax wrighti	5	1	50/33	41.5	17	1150000	Klicka et al., unpublished data
Eumomota superciliosa	4	2	22/9	15.5	13	242000	Witt, unpub. Diss.
Galbacyhynchus leucotis	2	1	2/(5)	-1.5	7	478000	Witt, unpub. Diss.
Galbula dea	6	3	9/(15)	-3	24	5920000	Witt, unpub. Diss.
Galbula pastazae	1	1	0/(4.5)	-2.25	4.5	21400	Witt, unpub. Diss.
Geothlypis aequinoctialis	12	8	10/(35)	-12.5	45	7880000	Klicka et al., unpublished data
Geothlypis beldingi	25	1	27.5/22.5	25	5	20	Klicka et al., unpublished data
Geothlypis flavovelata	8	1	20/27	23.5	7	52100	Klicka et al., unpublished data
Geothlypis formosus	3	1	43/30	36.5	13	1970000	Escalante et al. 2009. MP&E 53:668-678
Geothlypis nelsoni	15	1	27/16	21.5	11	117000	Klicka et al., unpublished data
Geothlypis poliocephala	6	2	26/9	17.5	17	859000	Escalante et al. 2009. MP&E 53:668-678
Geothlypis rostrata	30	2	26.5/24	25.25	2.5	8800	Klicka et al., unpublished data
Geothlypis semiflava	2	2	16/(4)	6	20	213000	Escalante et al. 2009. MP&E 53:668-678
Geothlypis speciosa	1	1	21/19	20	2	500	Escalante et al. 2009. MP&E 53:668-678
Geothlypis trichas	> 300	3	64/23	43.5	41	12800000	Escalante et al. 2009. MP&E 53:668-678
Glaucidium brasilianum	170	2	32/(38)	-3	70	15100000	Proudfoot et al. 2006. Cons. Genetics 7:1-12
Glyphorynchus spiurus	72	9	17 / (18)	-0.5	35	7200000	Marks, et al. 2002. MP&E 24:153-167
Grus canadensis	73	2	74/23	48.5	51	8600000	Rhymer et al. 2001. Cons. Genetics 2:203-218
Gypopsitta [Pyrilia] vulturina	9	2	(1)/(7)	-4	6	1328000	Ribas et al. 2005. J. Biogeo. 32: 1409-1427
Habia atrimaxillaris	1	1	9/8.5	8.75	0.5	1000	Klicka et al., unpublished data
Habia fuscicauda	72	3	23.5/8	15.75	15.5	582000	Klicka et al., unpublished data
Habia gutturalis	1	1	2016-08-05	6.5	3	803000	Klicka et al., unpublished data
Habia rubica	46	11	23.5/(32.5)	-4.5	56	5690000	Klicka et al., unpublished data
Haemorhous cassini	11	1	53/35	44	18	1500000	Smith. et al. 2013. MP & E 66:1055-1059
Haemorhous mexicanus	228	1	50/18	34	32	7550000	Hawley et al. 2008. Cons. Genetics 9:637-643 / Klicka unpublished data
Haemorhous purpureus	16	2	62/36	49	26	4530000	Smith. et al. 2013. MP & E 66:1055-1059
Hapaloptila castanea	1	1	2/(7)	-2.5	9	19400	Witt, unpub. Diss.
Henicorhina leucoptera	15	3	(4)/(6)	-5	3	3400	Perez et al.; unpublished data
Henicorhina leucosticta	79	13	24/(18)	3	42	2520000	Perez et al.; unpublished data
Hirundo rustica (erythrogaster)	7	1	66/18	42	48	?	Dor, et al. 2010. MP & E 56:409-418 / Zink et al. 2006. Proc. Roy. Soc. B 273: 1245-1251
Hylocharis leucotis	67	1	31/15	23	16	557000	Klicka et al., unpublished data
Hylocichla mustelina	3	1	49/30	39.5	19	3490000	Klicka et al., unpublished data
Hylomanes momotula	2	2	19/3	11	16	347000	Witt, unpub. Diss.
Hylophilus decurtatus	13	4	22/(5)	8.5	27	856000	Slager et al. 2014. Mol/ Phyl. & Evol. 80:95-104
Hylophilus ochraceiceps	22	6	22/(16)	3	38	6040000	Slager et al. 2014. Mol/ Phyl. & Evol. 80:95-104
Hypocnemis cantator	24	12	10/(15)	-2.5	25	968000	Tobias et al. 2008. Science 319:901
Icteria virens	41	2	64/24	44	40	6150000	Lovette, et al., 2004. Cons. Bio. 18:156-166
Icterus abeillei	15	1	21/19	20	2	340800	Kondo et al. 2004. Condor 106:674-680
Icterus dominicensis (without "prosthemelas")	6	3	18/25	21.5	7	201000	Omland et al. 1999. MP&E 12:224-239
Icterus galbula	20	1	53/31	42	22	8590000	Kondo et al. 2004. Condor 106:674-680
Icterus mesomelas	4	3	21/(7)	7	28	996000	Omland et al. 1999. MP&E 12:224-239
Icterus spurius	30	1	50/19	34.5	31	4780000	Baker et al. 2003. Auk 120:848-859
Ixoreus naevia	3	1	69.5/38	53.75	31.5	796000	Klicka et al., unpublished data
Jacamaralcyon tridactyla	1	1	(16)/(26)	-21	10	67200	Witt, unpub. Diss.
Jacamerops aureus	9	4	11/(15)	-2	25	5710000	Witt, unpub. Diss.
Junco phaeonotus (+ hyemalis)	262	1	68/15	41.5	53	10677000	Mila et al. 2007. 274:2653-2660
Junco vulcani	2	1	2016-11-09	10	2	1000	Mila et al. 2007. 274:2653-2660
Lampornis amethystinus	69	2	28/14	21	14	189000	Cortes-Rodriguez et al. 2008. MP&E 48:1-11
Leucosticte tephrocotis (+ australis, + atrata)	117	1	67/34	50.5	33	2414500	Drovetski et al. 2009. MP & E 50:437-445
Malacoptila rufa	4	3	(1)/(16)	-8.5	15	2590000	Witt, unpub. Diss.
Malacoptila semicinta	2	1	(3)/(12)	-7.5	9	650000	Witt, unpub. Diss.
Megascops flammeolus	167	1	52/17	34.5	35	1042000	Klicka et al., unpublished data
Melanerpes aurifrons	59	2	36.5/12.5	24.5	24	1390000	Garcia-Trejo, et al., 2009. Condor 111:442-452
Melanerpes carolinus	7	1	47.5/25	36.25	22.5	2990000	Garcia-Trejo, et al., 2009. Condor 111:442-452
Melanerpes formicivorus	98	1	45/14	29.5	31	1500000	Honey-Escandon et al. 2008. Wilson J. Orn. 120:478-493
Melospiza melodia	170	1	62/20	41	42	10300000	Zink and Dittmann, 1993. Evolution 47:717-729
Melozone fuscus	28	2	38/17	27.5	21	1640000	Zink et al., 2001. Condor 103:1-10
Microbates cinereiventris	12	3	11/(13)	-1	24	552000	Klicka et al., unpublished data
Microbates collaris	8	3	6/(7)	0	13	2370000	Klicka et al., unpublished data
Mionectes macconnelli	9	3	9/(18)	-4.5	27	2930000	Miller et al. 2008. Proc. Roy. Soc. 275:1133-1142
Mionectes oleagineus	133	8	22 / (21)	0.5	43	8930000	Miller et al. 2008. Proc. Roy. Soc. 275:1133-1142
Mionectes olivaceus	8	3	11/(15)	-2	26	745000	Miller et al. 2008. Proc. Roy. Soc. 275:1133-1142
Mionectes rufiventris	4	1	(15)/(30)	-22.5	15	1060000	Miller et al. 2008. Proc. Roy. Soc. 275:1133-1142
Molothrus ater	26	1	62/16	39	46	11200000	Ball and Avise, 1992. AUK 109:626-636
Momotus momotus (+ mexicanus)	40	14	26/(24)	1	50	10000000	Witt, unpub. Diss.
Monasa atra	1	1	10/(3)	3.5	13	1730000	Witt, unpub. Diss.
Myadestes elizabeth	1	1	20/22	21	2	8500	Miller et al., 2007. Auk, 124:868-885
Myadestes genibarbis	15	5	20/14	17	6	88000	Miller et al., 2007. Auk, 124:868-885
Myadestes melanops	6	1	2016-11-08	9.5	3	31900	Miller et al., 2007. Auk, 124:868-885
Myadestes obscurus	2	1	21	21	1	2600	Miller et al., 2007. Auk, 124:868-885
Myadestes occidentalis	60	2	28/16	22	12	529000	Miller et al., 2007. Auk, 124:868-885 / Klicka. Unpublished daata
Myadestes ralloides	17	4	12/(19)	-3.5	31	458000	Miller et al., 2007. Auk, 124:868-885
Myadestes townsendi	4	1	64/22	43	42	3580000	Miller et al., 2007. Auk, 124:868-885
Myadestes unicolor	7	1	22/15	18.5	7	140000	Miller et al., 2007. Auk, 124:868-885
Myadestes coloratus	7	2	2016-08-09	8.5	1	460	Miller et al., 2007. Auk, 124:868-885
Myarchus oberi	8	2	18 / 17	17.5	1	4400	Joseph et al.; 2004. Mol. Phy. & Evol. 31:139-152 / genbank
Myiarchus ferox	15	3	5 / (31)	-13	36	11900000	Joseph et al.; 2004. Mol. Phy. & Evol. 31:139-152 / genbank
Myiarchus phaeocephalus	2	2	1 / (6)	-2.5	7	99700	Joseph et al.; 2004. Mol. Phy. & Evol. 31:139-152
Myiarchus stolidus/sagrae	7	2	24 / 17	20.5	7	109000	Joseph et al.; 2004. Mol. Phy. & Evol. 31:139-152
Myiarchus swainsoni	49	3	4 / (40)	-18	44	11100000	Joseph et al.; 2004. Mol. Phy. & Evol. 31:139-152
Myiarchus tuberculifer	38	5	33 / (25)	4	58	10590000	Joseph et al.; 2004. Mol. Phy. & Evol. 31:139-152 / Klicka, unpublished data
Myiarchus tyrannulus	11	4	34 / (30)	2	64	10365000	Joseph et al.; 2004. Mol. Phy. & Evol. 31:139-152 / Klicka, unpublished data
Myioborus albifacies	4	1	7	7	1	17000	Perez, J. L. 2005. MP & E 37:511-528
Myioborus albifrons	4	1	2016-09-10	9.5	1	17300	Perez, J. L. 2005. MP & E 37:511-528
Myioborus cardonai	1	1	6	6	1	230	Perez, J. L. 2005. MP & E 37:511-528
Myioborus castaneocapillus	6	2	7/0.5	3.75	6.5	95600	Perez, J. L. 2005. MP & E 37:511-528
Myioborus flavivertex	4	1	10	10	1	5300	Perez, J. L. 2005. MP & E 37:511-528
Myioborus melanocephalus	7	3	1/(18)	-8.5	19	186000	Perez, J. L. 2005. MP & E 37:511-528
Myioborus miniatus	105	6	28/(19)	4.5	47	1240000	Perez, J. L. 2005. MP & E 37:511-528
Myioborus ornatus	6	1	8/1.5	4.75	6.5	91100	Perez, J. L. 2005. MP & E 37:511-528
Myioborus torquatus	2	1	2016-11-08	9.5	3	5300	Perez, J. L. 2005. MP & E 37:511-528
Myiopagis caniceps (& ollallai)	5	3	10/(28)	-9	38	7063400	Rheindt et al. 2009. MP&E 53:961-971 / Klicka, unpublished data
Myiopagis flavivertex	4	1	10/(11)	-0.5	21	1300000	Rheindt et al. 2009. MP&E 53:961-971 / Klicka, unpublished data
Myiopagis gaimardii	9	2	11/(22)	-5.5	33	8650000	Rheindt et al. 2009. MP&E 53:961-971 / Klicka, unpublished data
Myiopagis subplacens	1	1	1/(7)	-3	8	109000	Rheindt et al. 2009. MP&E 53:961-971 / Klicka, unpublished data
Myiopagis viridicata	19	7	33/(28)	2.5	61	7280000	Rheindt et al. 2009. MP&E 53:961-971 / Klicka, unpublished data
Nonnula brunnea	2	1	3/(5)	-1	8	251000	Witt, unpub. Diss.
Nonnula rubecula	3	3	9/(27)	-9	36	5360000	Witt, unpub. Diss.
Nonnula sclateri	1	1	(3)/(11)	-7	8	643000	Witt, unpub. Diss.
Notharchus ordii	2	2	6/(12)	-3	18	281000	Witt, unpub. Diss.
Oporornis agilis	2	1	53/44	48.5	9	1180000	Escalante et al. 2009. MP&E 53:668-678
Oporornis philadelphia	3	1	61/37	49	24	2710000	Escalante et al. 2009. MP&E 53:668-678
Oporornis tolmiei	18	2	61/35	48	26	2640000	Klicka et al., unpublished data
Oreothlypis ruficapilla	27	2	53/35	44	18	2770000	Lovette, et al., 2004. Cons. Bio. 18:156-166
Oreothlypis superciliosa	28	1	27.5/15	21.25	12.5	403000	Klicka et al., unpublished data
Passerculus sandwichensis	112	2	71/20	45.5	51	13801000	Zink et al., 2005. Condor 107:21-28
Passerella ilicaca	272	4	71/36	53.5	35	7540000	Zink, 1994. Evolution 48:96-111
Passerina amoena	6	1	52/30	41	22	2820000	Bryson, et al. 2013. J. of Biogeo. 41:587-599
Passerina ciris	8	1	38/26	32	12	1410000	Bryson, et al. 2013. J. of Biogeo. 41:587-599
Passerina cyanea	6	1	53/25	39	28	5860000	Bryson, et al. 2013. J. of Biogeo. 41:587-599
Passerina leclancherii	6	1	21/16	18.5	5	140000	Bryson, et al. 2013. J. of Biogeo. 41:587-599
Passerina rositae	2	1	16/17	16.5	1	7000	Bryson, et al. 2013. J. of Biogeo. 41:587-599
Perisoreus canadensis	206	4	69/35	52	34	7300000	van Els et al., 2012; Mo; Phyl. & Evol. 63:456-465
Petrochelidon fulva	13	5	33/14	23.5	19	988000	Kirchman et al. 2000. MP&E 14:107-121
Phaeothlypis fluvicauda	13	4	15/(15)	0	30	2470000	Lovette, I. 2004. MP&E 32:512-523
Phaeothlypis rivularis	10	3	10/(28)	-9	38	3990000	Lovette, I. 2004. MP&E 32:512-523
Phalacrocorax auritus	234	2	65/16	40.5	49	3240000	Mercer, D., unpuplished thesis
Pheucticus aureoventris	11	3	8/(32)	-12	40	810000	Pulgarin et al., 2013. MP&E. 69:1222-1227
Pheucticus chrysopeplus	8	2	29/14	21.5	15	297300	Pulgarin et al., 2013. MP&E. 69:1222-1227
Pheucticus ludovicianus	6	1	65/33	49	32	3780000	Pulgarin et al., 2013. MP&E. 69:1222-1227
Pheucticus melanocephalus	>200	3	53/16	34.5	37	4521000	Pulgarin et al., 2013. MP&E. 69:1222-1227
Pheucticus tibialis	2	2	2016-11-08	9.5	3	19600	Pulgarin et al., 2013. MP&E. 69:1222-1227
Picoides albolarvatus	78	1	46/33	39.5	13	500000	Alexander and Burns, 2006. Condor 108:489-508
Picoides pubescens	51	1	65/25	45	40	12800000	Ball and Avise, 1992. AUK 109:626-636
Picoides tridactylus	17	1	67/34	50.5	33	7900000	Zink et al. 2002. Condor 104:167-170
Picoides villosus	296	3	67/8	37.5	59	13300000	Klicka et al., 20111. The Auk 128:346-362
Pinicola enucleator	74	2	68/34	51	34	9000000	Drovetski et al. 2010. J. Biogeography 37:696-706
Pionopsitta [Pyrilia] barrabandi	5	1	6/(16)	-56	22	3470000	Ribas et al. 2005. J. Biogeo. 32: 1409-1427
Pionopsitta [Pyrilia] caica	5	1	9/(3)	3	12	1290000	Ribas et al. 2005. J. Biogeo. 32: 1409-1427
Pionopsitta [Pyrilia] haemototis	7	2	19/8	13.5	11	430000	Ribas et al. 2005. J. Biogeo. 32: 1409-1427
Pionopsitta [Pyrilia] pulchra	2	1	7/(4)	1.5	11	92600	Ribas et al. 2005. J. Biogeo. 32: 1409-1427
Pionopsitta [Pyrilia] pyrilia	2	1	2016-10-03	6.5	3	153000	Ribas et al. 2005. J. Biogeo. 32: 1409-1427
Pionus chalcopterus	3	2	10/(5)	2.5	15	177000	Ribas et al. 2007. Proc. Roy soc. London, 274:2399-2408
Pionus fuscus	2	1	9/(1)	4	10	1870000	Ribas et al. 2007. Proc. Roy soc. London, 274:2399-2408
Pionus maximiliani	6	2	(3)/(29)	-16	26	4520000	Ribas et al. 2007. Proc. Roy soc. London, 274:2399-2408
Pionus menstruus	12	3	11/(19)	-4	30	8510000	Ribas et al. 2007. Proc. Roy soc. London, 274:2399-2408
Pionus senilis	2	1	23/8	15.5	15	459000	Ribas et al. 2007. Proc. Roy soc. London, 274:2399-2408
Pionus sordidus	7	3	10/(19)	-4.5	29	169000	Ribas et al. 2007. Proc. Roy soc. London, 274:2399-2408
Pionus tumultuosus	3	2	10/(19)	-4.5	29	262000	Ribas et al. 2007. Proc. Roy soc. London, 274:2399-2408
Pipilo erythophthalmus	70	1	51/25	38	26	?	Klicka et al., unpublished data
Pipilo maculatus	288	4	54.5/14.5	34.5	40	3030000	Klicka et al., unpublished data
Piranga bidentata	8	1	29/8.5	18.75	20.1	399000	Klicka et al., unpublished data
Piranga erythrocephala	8	1	27/16	21.5	11	256000	Klicka et al., unpublished data
Piranga flava	88	8	38/(35)	1.5	73	7720000	Klicka et al., unpublished data
Piranga leucoptera	12	4	22.5/(20)	1.25	42.5	566000	Klicka et al., unpublished data
Piranga ludoviciana	212	1	64/29	46.5	35	977000	Klicka et al., unpublished data
Piranga olivacea	5	1	52.5/31.5	41.5	21	4470000	Klicka et al., unpublished data
Piranga roseogularis	3	1	21/17	19	4	106000	Klicka et al., unpublished data
Piranga rubra	52	2	42.5/25	33.75	17.5	3270000	Klicka et al., unpublished data / Shepherd & Burns 2007. Av. Biol. 38:13-27
Plectrophenax hyperboreus	40	1	66/56	61	10	5400	Maley and Winker, 2010. Mol Ecology 19:785-797
Plectrophenax nivalis	40	1	82/54	68	28	6830000	Maley and Winker, 2010. Mol Ecology 19:785-797
Poecile atricapillus	82	2	67/34	50.5	33	8820000	Gill et al., 2005, Auk 121:121-143 / Gill et al. 1993. Evolution 47:195-212
Poecile carolinensis	78	2	40/28	34	12	2310000	Gill et al., 2005, Auk 121:121-143 / Gill et al. 1993. Evolution 47:195-212
Poecile gambeli	10	2	60/28	44	32	2700000	Gill et al., 2005, Auk 121:121-143 / Gill et al. 1993. Evolution 47:195-212
Poecile hudsonicus	37	2	67/46	56.5	21	7100000	Gill et al., 2005, Auk 121:121-143 / Gill et al. 1993. Evolution 47:195-212
Poecile rufescens	10	1	61/36	48.5	25	958000	Gill et al., 2005, Auk 121:121-143 / Gill et al. 1993. Evolution 47:195-212
Poecile sclateri	8	2	31.5/16	23.75	15.5	202000	Gill et al., 2005, Auk 121:121-143 / Gill et al. 1993. Evolution 47:195-212
Polioptila albiloris	20	3	18/11	14.5	7	221000	Klicka et al., unpublished
Polioptila caerulea	58	5	47/17	32	30	6580000	Klicka and Robbins, unpublished data
Polioptila californica	64	1	34/23	28.5	11	129000	Zink et al., 2000. Cons. Biol. 14:1394-1405
Polioptila dumicola	4	1	(36)/(5)	-20.5	31	3680000	Klicka and Robbins, unpublished data
Polioptila guianensis	8	3	7/(2)	2.5	9	1410000	Klicka and Robbins, unpublished data
Polioptila lactea	1	1	(28)/(22)	-25	6	441000	Klicka and Robbins, unpublished data
Polioptila lembeyei	5	1	20/22	21	2	13600	Klicka and Robbins, unpublished data
Polioptila melanura	34	1	37/20	28.5	17	1110000	Zink et al., 2001. Condor 103:1-10
Polioptila nigriceps	4	1	31/17	24	14	167000	Klicka et al., unpublished
Polioptila plumbea	48	9	21.5/(13)	4.25	34.5	6790000	Klicka et al., unpublished
Polioptila schistaceigula	2	2	9/(2)	3.5	11	144000	Klicka et al., unpublished
Premnoplex tatei	3	2	2016-09-11	10	2	1700	Perez et al. 2010 Condor 112:561-570
Progne subis	10	2	56/21	43.5	35	5700000	Moyle et al. 2008. Wilson J. Ornithol. 120:683-691.
Psarocolius angustifrons	5	3	11/(19)	-4	29	2230000	Price and Lanyon. 2004. Behavioral Ecol. 15:485-497
Pselliophorus luteoviridis	1	1	2016-07-08	7.5	1	1400	Klicka et al. 2014. MP&E 77:177-182
Pselliophorus tibialis	1	1	2016-08-11	9.5	3	6600	Klicka et al. 2014. MP&E 77:177-182
Pteroglosssus bitorquatus	3	2	(1)/(17)	-9	16	2070000	Patel et al. 2011. MP&E 58:105-115
Pteroglossus [Baillonius] bailloni	1	1	(11)/(27)	-19	15	654000	Patel et al. 2011. MP&E 58:105-115
Pteroglossus frantzii	2	1	10/8.5	9.25	1.5	19800	Patel et al. 2011. MP&E 58:105-115
Pteroglossus pluricinctus	2	1	9/(5)	2	14	1260000	Patel et al. 2011. MP&E 58:105-115
Pteroglossus viridis	2	1	8/(3)	2.5	11	1560000	Patel et al. 2011. MP&E 58:105-115
Pyrrhua leucotis	18	4	10/(23)	-6.5	33	310000	Ribas et al. 2006. Auk 123: 660-680
Pyrrhua picta	36	6	10/(15)	-2.5	25	3870000	Ribas et al. 2006. Auk 123: 660-680
Quiscalus lugubris	2	2	0/17	8.5	17	701000	Powell et al. 2008. Condor 110:718-728
Quiscalus major	14	1	25/40	32.5	15	203000	DaCosta et al. 2008. Condor 110:170-177
Quiscalus mexicanus	59	2	43/(3)	20	46	5010000	DaCosta et al. 2008. Condor 110:170-177
Quiscalus niger	4	4	18/23	20.5	5	205000	Powell et al. 2008. Condor 110:718-728
Quiscalus quiscala	35	1	64/25	44.5	39	8220000	Zink et al., 1991. Condor 93:318-329
Ramphastos brevis	2	1	8/(3)	2.5	11	106000	Patane et al. . MP& E 2009 53:923-934
Ramphastos dicolorus	2	1	(18)/(30)	-24	12	1390000	Patane et al. . MP& E 2009 53:923-934
Ramphastos tucanus-cuvieri	6	2	10/(18)	-4	28	7340000	Patane et al. . MP& E 2009 53:923-934
Ramphastos vitellinus-culminatus-citreolaemus	16	4	10/(27)	-8.5	37	7850000	Patane et al. . MP& E 2009 53:923-934
Ramphocaenus melanurus	34	12	21/(22)	-0.5	43	9160000	Klicka et al., unpublished data
Regulus calendula	>200	1	68/33	50.5	35	5700000	Klicka et al., unpublished data
Regulus satrapa	>200	2	62.5/16.5	39.5	46	6340000	Klicka et al., unpublished data
Ridgwayia pinicola	2	1	30/16	23	14	336000	Klicka et al., unpublished data
Saltator albicollis	7	1	17/14	15.5	3	4000	Chaves et al. 2013. J. Biogeo. 40:2180-2190
Saltator atriceps	12	1	23/8	15.5	15	711000	Chaves et al. 2013. J. Biogeo. 40:2180-2190
Saltator atricollis	3	1	(4)/(25)	-10.5	21	2750000	Chaves et al. 2013. J. Biogeo. 40:2180-2190
Saltator atripennis	4	1	8/(4)	2	12	102000	Chaves et al. 2013. J. Biogeo. 40:2180-2190
Saltator aurantiirostris	10	3	(6)/(42)	-24	36	2470000	Chaves et al. 2013. J. Biogeo. 40:2180-2190
Saltator cinctus	2	1	7/(5)	1	12	70600	Chaves et al. 2013. J. Biogeo. 40:2180-2190
Saltator coerulescens	22	6	22/(35)	-6.5	57	10100000	Chaves et al. 2013. J. Biogeo. 40:2180-2190
Saltator grossus	16	3	16/(17)	-0.5	33	6240000	Chaves et al. 2013. J. Biogeo. 40:2180-2190
Saltator maximus	45	4	19/(23)	-2	42	9540000	Chaves et al. 2013. J. Biogeo. 40:2180-2190
Saltator nigriceps	4	1	(4)/(7)	-5.5	3	19700	Chaves et al. 2013. J. Biogeo. 40:2180-2190
Saltator orenocensis	2	1	2016-12-06	9	6	408000	Chaves et al. 2013. J. Biogeo. 40:2180-2190
Saltator similis	3	2	(12)/(32)	-22	20	3040000	Chaves et al. 2013. J. Biogeo. 40:2180-2190
Saltator striatipectus	11	4	12/(14)	-1	26	859000	Chaves et al. 2013. J. Biogeo. 40:2180-2190
Scelurus caudacutus	24	5	9/(21)	-6	30	5470000	d;Horta et al. 2013. J. of Biogeo. 40:37-49
Scelurus guatemalensis	7	2	18/(2)	8	20	417000	d;Horta et al. 2013. J. of Biogeo. 40:37-49
Schiffornis turdina	38	8	21.5 / (23)	-0.75	44.5	7960000	Nyari; 2007. Mol. Phy. & Evol. 44:154-164
Sclerurus albigularis	12	3	11/(18)	-3.5	29	370000	d;Horta et al. 2013. J. of Biogeo. 40:37-49
Sclerurus mexicanus	25	9	20/(23)	-1.5	43	6320000	d;Horta et al. 2013. J. of Biogeo. 40:37-49
Sclerurus rufigularis	27	5	9/(15)	-3	24	4900000	d;Horta et al. 2013. J. of Biogeo. 40:37-49
Sclerurus scansor	10	1	(3)/(32)	-17.5	29	2750000	d;Horta et al. 2013. J. of Biogeo. 40:37-49
Scolopax minor	114	1	51/18	34.5	33	4260000	Rhymer et al. 2005. Auk 122:1149-1160
Setophaga ruticilla	175	1	65/30	47.5	35	6680000	Colbeck, et al. 2008. J. Heredity 99:453-463
Sialia currucoides	32	1	66/20	43	46	2760000	Klicka et al., unpublished data
Sialia mexicana	25	1	53/19	36	34	1780000	Klicka et al., unpublished data
Sialia sialis	27	4	53.5/12.5	33	41	3330000	Klicka et al., unpublished data
Sitta canadensis	>200	1	63/32	47.5	31	7140000	Spellman & Klicka, unpublished data
Sitta carolinensis	216	4	66/18.5	42.5	47.5	8620000	Spellman & Klicka, 2007. Mol. Ecol. 16:1729-1740
Sitta pygmaea	202	1	52/18	35	34	1950000	Spellman & Klicka, 2006. Roy. Soc. Proc. B 282:
Spizella passerina	247	1	66/14	40	52	13100000	Mila et al. 2006. Evolution 60:2403-2409
Sterna antillarum	417	1	42/18	30	24	1338000	Draheim et al. 2010. Auk 127:907-819
Strix occidentalis	73	3	51/22	36.5	29	1205000	Barrowclough et al. 1999. Evolution 53:919-931
Sturnella lilianae	9	1	35/28	31.5	7	?	Barker et al. 2008. Auk 125:869-879
Sturnella magna	28	3	50/(1)	24.5	51	xxx	Barker et al. 2008. Auk 125:869-879
Sturnella neglecta	8	1	55/22	38.5	33	6720000	Barker et al. 2008. Auk 125:869-879
Tacycineta bicolor	408	1	66/33	44.5	33	11700000	Stenzler et al. 2009. Condor 111:470-478
Thamnophilus punctatus		6	15 / (25)	-5	40	1570000	Brumfield & Edwards; 2007. Evolution (Feb) 346-361 / Lacerda et al.; 2007. Braz. J. Biol. 67:873-882
Tityra semifasciata	40	4	26/(25)	0.5	51	6170000	Burney, unpub. Diss; Burney and Brumfield 2009. Am. Nat. 174:358-368
Toxostoma curvirostre	66	2	38/16.5	27.25	21.5	2040000	Zink and Blackwell, 2000. Condor 102:881-886
Toxostoma lecontei	14	2	37.5/26	31.75	11.5	251000	Zink et al.,Condor 99:132-138
Toxostoma redivivum	64	1	42/30	36	12	167000	Sgariglia and Burns, 2003. Auk 120:346-361
Troglodytes browni	2	1	2016-08-11	8.5	3	1500	Klicka et al., unpublished data
Troglodytes ochraceus	3	1	2016-08-11	8.5	3	17300	Klicka et al., unpublished data
Troglodytes rufociliatus	2	2	17/13	15	4	98500	Klicka et al., unpublished data
Troglodytes rufulus	3	2	2016-01-05	3	4	58600	Klicka et al., unpublished data
Troglodytes solstitialis	14	9	10/(25)	-7.5	35	554000	Klicka et al., unpublished data
Troglodytes troglodytes	97	2	62/35	48.5	27	10000000	Drovetski et al. 2004. Proc. Roy. Soc. London B, 271:545-551
Trogon comptus	5	1	7 / (3)	2	10	79400	DaCosta & Klicka, 2008. Molecular Ecology 17:1328-1343
Trogon aurantiiventris	5	1	2016-12-08	10	4	27300	DaCosta & Klicka, 2008. Molecular Ecology 17:1328-1343
Trogon bairdi	3	1	10 & 8	9	2	12500	DaCosta & Klicka, 2008. Molecular Ecology 17:1328-1343
Trogon citreolus	2	1	23 / 16	19.5	7	124000	DaCosta & Klicka, 2008. Molecular Ecology 17:1328-1343
Trogon clathratus	2	1	2016-08-12	10	4	16300	DaCosta & Klicka, 2008. Molecular Ecology 17:1328-1343
Trogon collaris	19	5	22/(20)	1	42	6800000	DaCosta & Klicka, 2008. Molecular Ecology 17:1328-1343
Trogon curucui	9	2	1 / (23)	-11	24	7400000	DaCosta & Klicka, 2008. Molecular Ecology 17:1328-1343
Trogon elegans	7	2	33 / 11.5	22.25	21.5	695000	DaCosta & Klicka, 2008. Molecular Ecology 17:1328-1343
Trogon massena	9	1	17.5 / 0	8.75	17.5	493000	DaCosta & Klicka, 2008. Molecular Ecology 17:1328-1343
Trogon melanocephalus	7	1	22 / 11	16.5	11	444000	DaCosta & Klicka, 2008. Molecular Ecology 17:1328-1343
Trogon melanurus	13	3	8 / (18)	-5	26	?	DaCosta & Klicka, 2008. Molecular Ecology 17:1328-1343
Trogon mexicanus	14	1	27 / 14	20.5	13	375000	DaCosta & Klicka, 2008. Molecular Ecology 17:1328-1343
Trogon personatus	13	6	12 /(12)	0	24	746000	DaCosta & Klicka, 2008. Molecular Ecology 17:1328-1343
Trogon rufus	14	6	14 / (29)	-7.5	43	6660000	DaCosta & Klicka, 2008. Molecular Ecology 17:1328-1343
Trogon surrucura	5	1	(12.5) / (29)	-20.75	16.5	1550000	DaCosta & Klicka, 2008. Molecular Ecology 17:1328-1343
Trogon violaceus	17	5	24 / (25)	-0.5	49	?	DaCosta & Klicka, 2008. Molecular Ecology 17:1328-1343
Trogon viridis	16	2	8 / (23)	-7.5	31	?	DaCosta & Klicka, 2008. Molecular Ecology 17:1328-1343
Vireo altiloquus	3	1	20/11	15.5	9	242000	Slager et al. 2014. Mol/ Phyl. & Evol. 80:95-104
Vireo atricapilla	108	1	35/25	30	10	141000	Zink et al. 2010. Auk 127:797-806
Vireo belli	86	2	47/22	34.5	25	291000	Klicka, L. et al. 2016. Cons. Genetics 17:455
Vireo brevipennis	2	1	20/16	18	4	163000	Slager et al. 2014. Mol/ Phyl. & Evol. 80:95-104
Vireo carmioli	2	1	10.5/9	10	1.5	34200	Slager et al. 2014. Mol/ Phyl. & Evol. 80:95-104
Vireo cassini	>60	1	54/32	42	22	923000	Klicka, unpublished data
Vireo flavoviridis	27	2	31/9	20	22	1010000	Slager et al. 2014. Mol/ Phyl. & Evol. 80:95-104
Vireo gilvus	10	2	67/17	42	50	1250000	Slager et al. 2014. Mol/ Phyl. & Evol. 80:95-104
Vireo griseus	4	1	42.5/26.5	34.5	16	1250000	Slager et al. 2014. Mol/ Phyl. & Evol. 80:95-104
Vireo huttoni	32	1	51/15	33	36	1210000	Klicka, unpublished data
Vireo hypochryseus	2	1	27/15.5	21.25	11.5	354000	Slager et al. 2014. Mol/ Phyl. & Evol. 80:95-104
Vireo latimeri	3	1	17.5/18.5	18	1	7000	Slager et al. 2014. Mol/ Phyl. & Evol. 80:95-104
Vireo leucophrys	16	5	26/(18)	4	44	575000	Slager et al. 2014. Mol/ Phyl. & Evol. 80:95-104
Vireo modestus	2	1	18.5/17.5	18	1	11000	Slager et al. 2014. Mol/ Phyl. & Evol. 80:95-104
Vireo olivaceus	30	6	61/(37)	12	98	11600000	Slager et al. 2014. Mol/ Phyl. & Evol. 80:95-104
Vireo osburni	2	1	18.5/17.5	18	1	11000	Slager et al. 2014. Mol/ Phyl. & Evol. 80:95-104
Vireo philadelphicus	3	1	60/43	51.5	17	673000	Slager et al. 2014. Mol/ Phyl. & Evol. 80:95-104
Vireo plumbeus	>60	2	46/13	29.5	33	520000	Klicka, unpublished data
Vireo solitarius	3	1	62/34	43	28	1550000	Slager et al. 2014. Mol/ Phyl. & Evol. 80:95-104
Vireo vicinior	6	1	39/29	34	10	179000	Slager et al. 2014. Mol/ Phyl. & Evol. 80:95-104
Wilsonia pusilla	36	2	68/36	52	32	7950000	Kimura et al. 2001. Mol. Ecol. 11:1605-1616
Xenops minutus	121	11	20.5/(28)	-3.75	48.5	9720000	Burney, unpub. Diss; Burney and Brumfield 2009. Am. Nat. 174:358-368
Xiphorhynchus [Dendroplex] picus	6	2	11/(19)	-4	30	9930000	Alexeio. 2002. Auk 119:621-640 / Weir et al. 2009. PNAS 106:21737-21742
Xiphorhynchus erythropygius	5	2	23/(5)	9	28	391000	Alexeio. 2002. Auk 119:621-640 / Irestedt et al. 2004. J. Avian Biol. 35:280-288 / Weir et al. 2009. PNAS 106:2137-21742
Xiphorhynchus flavigaster	10	2	25/11	18	14	767000	Alexeio. 2002. Auk 119:621-640
Xiphorhynchus fuscus	34	4	(4)/(30)	-17	26	2240000	Cabanne et al. 2008. MP&E 49:760-773
Xiphorhynchus guttatus	21	4	10/(23)	-6.5	33	8330000	Alexeio. 2002. Auk 119:621-640
Xiphorhynchus obsoletus	30	1	10/(15)	-2.5	25	6660000	Aleixo, 2006. Biol. J Linn. Soc. 89:383-395
Xiphorhynchus ocellatus	5	4	3/(20)	-8.5	23	2810000	Alexeio. 2002. Auk 119:621-640
Xiphorhynchus spixii	21	2	(1)/(12)	-6.5	11	637000	Aleixo, 2004. Evolution 58:1303-1317
Xiphorhynchus sussurans	26	3	15/(7)	4	22	611000	Alexeio. 2002. Auk 119:621-640
Xiphorhynchus triangularis	3	2	10/(18)	-4	28	286000	Alexeio. 2002. Auk 119:621-640 / Irestedt et al. 2004. J. Avian Biol. 35:280-288
Xyphorhynchus [Dendroplex] kienerii [necopinus]	21	1	2/(8)	-3	10	219000	Aleixo, 2006. Biol. J Linn. Soc. 89:383-395
Xyphorhynchus elegans	59	5	6/(16)	-5	22	2950000	Aleixo, 2004. Evolution 58:1303-1317
Zenaida macroura	17	1	55/8	31.5	47	11100000	Ball and Avise, 1992. AUK 109:626-636
Zonotrichia capensis	92	3	16/(55)	-19.5	71	12700000	Lougheed et al., 2013. BMC Evol. Biol. 13:58
