# Supplementary material for: How Many Kinds of Birds Are There and Why Does It Matter?
Source: PLoS One. 2016 Nov 23;11(11):e0166307. doi: 10.1371/journal.pone.0166307 (PMC5120813; doi:10.1371/journal.pone.0166307)
Supplement: S3 Table — Approximate localities and numbers of individuals used are indicated in parentheses. (XLSX) [file pone.0166307.s004.xlsx]

## Sheet: Sheet1
Table S3. Mitochondrial DNA distances between avian sister taxa.
taxon 1	taxon 2	gene	uncorrected distance	mid latitudes	mid-lat average
Adelomyia melanogenys maculata (wECU[Andes]; n= 11)	A. m. maculata (wECU[coastal]; n= 9)	ATPase	2.3	(1) + (1) x.5=	1)	Chaves et al.; 2007. Mol. Phy. & Evol. 43:795-807
Amaurospiza carizalensis (VEN; n = 1)	A. moesta (BRAne; n=1)	ND2	5.7	8 + (20) x .5	6)	Bryson, et al. 2013. J. of Biogeo. 41:587-599
Amazona ochrocephala ochrocephala (COL; n = 2)	A. o. ochrocephala (VEN; n = 2)	CO1	1.2	5 + 8 x.5 =	6.5	Ribas et al. 2007. Ibis 149:564-574
Amazona oratrix oratrix (n = 8)	A. o. belizensis (n = 3)	ND2	0.7	18.5 + 16.5 x.5 =	17.5	Ribas et al. 2007. Ibis 149:564-574
Arremon abeillei nigriceps (ECUse; n = 2)	A. a. abeillei (ECUw; n = 4)	ND2	6.2	(5) + (2) x.5 =	3.5	Klicka et al., unpublished
Arremon atricapillus (COL; n = 8)	A. torquatus tacarcunae (PANe; n = 3)	ND2	2	5.5 + 8.5 X.5 =	7	Cadena et al. 2007. MP&E 44:993-1016
Arremon aurantiirostris (MX, HON, NIC, CR, PANw; n = 12)	A. aurantiirostris (COLw, ECUw; n = 5)	ND2	7.8	12.75 + 4 x.5 =	8.4	Klicka, unpublished
Arremon aurantiirostris (PANe; n = 3)	A. aurauntiirostris (PANw; n = 5)	ND2	1.3	9 + 7 x.5 =	8	Klicka, unpublished
Arremon brunneinucha apertus (Mxe; n = 3)	A. b. brunneinucha (MXc; n = 3)	ND2	5	18 + 20 x.5 =	19	Cadena et al. 2007. MP&E 44:993-1016
Arremon brunneinucha frontalis (PANe; n = 2)	A. b. frontalis/inornatus (ECU, COL; n = 32)	ND2	2.1	8.5 + (1.5)	3.5	Cadena et al. 2007. MP&E 44:993-1016
Arremon brunneinucha macrourus (GUAw; n = 5)	A. b. alleni (ElSAL; n = 2)	ND2	3.8	15 + 13 x.5 =	14	Cadena et al. 2007. MP&E 44:993-1016
Arremon brunneinucha suttoni (MXs; n = 4)	A. virenticeps (MXs; n = 2)	ND2	4.3	17 + 18.5 x.5 =	17.8	Cadena et al. 2007. MP&E 44:993-1016
Arremon flavirostris (BOL, ARGn; n = 3)	A. flavirostris (BRA, ARGe, PAR; n = 7)	ND2	1.7	(21) + (21) x.5 =	21)	Klicka, unpublished
Arremon taciturnus nigrirostris (PER, BOL, BRAs; n = 9)	A. t. taciturnus (VEN, GUY, BRAn; n = 14)	ND2	2.4	(4) + (10) x.5 =	7)	Klicka, unpublished
Arremon torquatus basilicus (COLn; n = 2)	A. t. perijanus (VENw; n = 2)	ND2	6.9	10 + 9 x.5 =	9.5	Cadena et al. 2007. MP&E 44:993-1016
Arremon torquatus borelli/fimbriatus (BOLs, ARGn; n = 6)	A. t. torquatus (BOLn; n = 13)	ND2	2.6	(22.5) + (11.75) x.5=	17.13)	Cadena et al. 2007. MP&E 44:993-1016
Arremon torquatus nigrifrons/assimilis (PER, ECU; n = 22)	A. t. assimilis (PER, ECU, COL; n = 10)	ND2	1.5	5 + (2) x.5 =	1.5	Cadena et al. 2007. MP&E 44:993-1016
Arremon torquatus poliophrys (PERw; n = 5)	A. t. poliophrys (PERw; n = 2)	ND2	2.1	(9.5) + (11.5) x.5 =	10.5	Cadena et al. 2007. MP&E 44:993-1016
Arremon virenticeps (MXc; n = 3)	A. virenticeps (MXw; n = 2)	ND2	0.9	19 + 22.5 x.5 =	20.8	Cadena et al. 2007. MP&E 44:993-1016
Atlapetes albinucha/guttutalis (n = 11)	A. pileatus (MEX; n = 6)	ND2	3.4	14 + 21.5 x.5 =	17.75	Cadena et al., unpublished data
Atlapetes albofrenatus (VEN [Merida]; n = 2)	A. "rufinucha" (VEN, COL; n = 6)	ND2	2.4	9 + 9 x.5 =	9	Cadena et al., unpublished data
Atlapetes citrinellus (ARG, n = 2)	A. fulviceps (BOL, n = 2)	ND2	1.1	(27) + (20) x.5=	23.5)	Cadena et al., unpublished data
Atlapetes flaviceps (ECU, n=1)	A. fuscoolivaceus (COL, n = 1)	ND2	0.3	4 + 2 x.5=	3	Cadena et al., unpublished data
Atlapetes leucopterus (ECU, n = 1)	A. pallidiceps (ECU, n = 1)	ND2	0.6	(3) + (2) x.5=	2.5)	Cadena et al., unpublished data
Atlapetes melanopsis (PER, n = 1)	A. schistaceus (PER, n = 1)	ND2	2.9	(13) + (14) x.5 =	13.5)	Klicka et al. 2014. MP&E 77:177-182
Atlapetes nationi (n=3)	A. seebohmi (n=2)	ND2	1.8	(12.5) + (5) x.5 =	8.75)	Cadena et al., unpublished data
Atlapetes pallidinucha (COL, n = 3)	A. pallidinucha (PER, ECU; n = 3)	ND2	1.4	0 + (6) x.5 =	3)	Cadena et al., unpublished data
Atlapetes personatus (VEN, Amazonia; n = 2)	A. personatus (VEN, Bolivar; n = 1)	ND2	2.6	3 + 6+ x.5 =	4.5	Cadena et al., unpublished data
Atlapetes rufinucha (PER [Ancash]; n = 1)	A. leucopterus (ECU S; n = 2)	ND2	0.5	(2.5) + (9) x.5 =	5.75	Cadena et al., unpublished data
Atlapetes rufinucha (PER [Cuzco]; n = 3)	A. rufinucha (BOL, PER; n = 36)	ND2	0.9	(14) + (15) x.5 =	14.5	Cadena et al., unpublished data
Atlapetes schistaceus (COL NE, n = 1)	A. schistaceus (VEN, n=2)	ND2	1.4	8 + 9 x.5 =	8.75	Cadena et al., unpublished data
Atlapetes semirufus (COLn; n = 2)	A. semirufus (COLcen; n = 2)	ND2	0.8	5 + 8 x.5 =	6.5	Cadena et al., unpublished data
Atlapetes semirufus (VEN [Sucre]; n = 6)	A. semifrufus (VEN [Falcon]; n = 5)	ND2	0.7	11 + 9 x.5 =	10	Cadena et al., unpublished data
Aulacorhynchus prasinus (ECUe; n = 2)	A. prasinus (PERw; n = 8)	Cytb	0.7	(2) + (5) x.5 =	3.5)	Puebla-Olivares et al. 2008. The Auk 125:39-50
Aulacorhynchus prasinus (MEX Oaxaca E; n = 2)	A. prasinus (MEX Oaxaca W; n = 2)	Cytb	2.1	17 + 15 x.5 =	16	Puebla-Olivares et al. 2008. The Auk 125:39-50
Aulacorhynchus prasinus (NIC, ElSal; n = 7)	A. prasinus (MEX E; n = 7)	Cytb	1.2	14 + 20 x.5 =	17	Puebla-Olivares et al. 2008. The Auk 125:39-50
Aulacorhynchus prasinus (VEN, S. Perija; n = 3)	A. prasinus (COL E Andes; n = 2)	Cytb	1	10 + 7 x.5 =	8.5	Puebla-Olivares et al. 2008. The Auk 125:39-50
Automolus ochrolaemus (BOL, BRAe; n = 10)	A. ochrolaemus ( PERse, BOLw; n = 15)	Cytb	1.9	(11) + (12) x.5 =	11.5	Burney, unpub. Diss; Burney and Brumfield 2009. Am. Nat. 174:358-368
Brotogeris cyanoptera (ECU E; n = 4)	B. cyanoptera (PER E, BOL; n = 6)	ND2	0.7	(3) + (8) x.5 =	5.5)	Ribas et al. 2009. J of Biogeo 36:1712 - 1729
Brotogeris pyrrhopterus (n = 5)	B. jugularis (n = 8)	ND2	4.6	10.5 = (3) x.5 =	4.25	Ribas et al. 2009. J of Biogeo 36:1712 - 1729
Brotogeris versicolurus (n = 5)	B. chiriri (n = 5)	ND2	0.9	.5 + (14.5) x.5 =	7)	Ribas et al. 2009. J of Biogeo 36:1712 - 1729
Cacicus cela cela (BRA, VEN, PER, GUY; n = 4)	C. c. vitellinus (PAN; n = 1)	ND2	5.6	(1) + 9 x.5 =	4	Price and Lanyon. 2004. Behavioral Ecol. 15:485-497
Cacicus sclateri	C. chrysopterus	ND2	5.3	0 + (25) x.5 =	12.5)	Price and Lanyon. 2004. Behavioral Ecol. 15:485-497
Cacicus uropygialis uropygialis (ECUe, PER; n = 2)	C. u. pacificus (ECUw; n = 1)	ND2	3.1	(3) + 1 x.5 =	1)	Price and Lanyon. 2004. Behavioral Ecol. 15:485-497
Capito niger [auratus] (PER NE; n =2 )	C. n. [auratus] (PER, BRA, VEN; n = 9)	Cytb	4	(3) + (2.5) x.5 =	2.75)	Armenta et al. 2005. Condor 107:527-536
Cardellina pusilla (USw; n = 23)	C. pusilla (USe; n = 10)	Cytb	4	52 + 51.5 x.5 =	51.75	Kimura et al. 2001. Mol. Ecol. 11:1605-1616
Coereba flaveola (BAH; n = 1)	C. flaveola (MXe; n = 1)	ND2	4.2	27 + 21 x.5 =	24	Bellemain et al., 2008. BMC Evol. Biol. 8:240
Coereba flaveola (BOL, PER; n = 4)	C. flaveola (VEN, Trin; n = 4)	ND2	0.7	10 + (13)	1.5)	Bellemain et al., 2008. BMC Evol. Biol. 8:240
Coereba flaveola (L Antilles; n = 17)	C. flaveola (P Rico; n = 3)	ND2	1.7	18 + 15 x.5 =	16.5	Bellemain et al., 2008. BMC Evol. Biol. 8:240
Cyanocompsa brissoni (PAR; n = 1)	C. brissoni (BRAne; n = 2)	ND2	1.1	(26) + (10.5) x.5 =	18.25)	Bryson, et al. 2013. J. of Biogeo. 41:587-599
Cyanocompsa cyanoides (GUY, VENs, BRAnw; n = 11)	C. cyanoides (PER, ECUe; n = 9)	ND2	0.9	0 + (12) x.5 =	6)	Bryson, et al. 2013. J. of Biogeo. 41:587-599
Cyanocompsa cyanoides (VENnc; n = 2)	C. cyanoides (PANe, ECUw; n = 23)	ND2	1.55	7.5 + 3.25 x.5 =	5.4	Bryson, et al. 2013. J. of Biogeo. 41:587-599
Cyanocompsa parellina (MXe; n = 11)	C. parellina (HON, ELSAL; n = 3)	ND2	2.1	19 + 14 x.5 =	16.5	Bryson, et al. 2013. J. of Biogeo. 41:587-599
Deconychura longicauda (PANe; n = 3)	D. longicauda (ECU?; n = 1)	Cytb	5.3	8 + (3) x.5 =	2.5	Irestedt et al. 2004. J. Avian Biol. 35:280-288 /Weir et al. PNAS 2009. 106:21737-21742
Dendrocincla fuliginosa fuliginosa (BRAe; n = 1)	D. f. atriostris (PER, BOL; n = 5)	CytB	4.8	2 + (13) x. 5 =	5.5)	Irestedt et al. 2004. J. Avian Biol. 35:280-288 /Weir et al. PNAS 2009. 106:21737-21742
Dendrocincla fuliginosa ridgewayi (PANe, ECUw; n = 5)	D. f. meruloides (TRIN; n = 1)	CytB	2.5	8 + 10 x.5 =	9	Irestedt et al. 2004. J. Avian Biol. 35:280-288 /Weir et al. PNAS 2009. 106:21737-21742
Dendrocincla homochroa (PANw; n = 4)	D. homochroa (PANe; n = 4)	ND2	1.7	8 + 9 x.5 =	8.5	Miller, unpublished data
Dendrocincla merula olivascens (BRAsw; n = 1)	D. merula (ECU?; n = 1)	CytB	1.4	(12) + 0 x.5 =	6)	Irestedt et al. 2004. J. Avian Biol. 35:280-288 /Weir et al. PNAS 2009. 106:21737-21742
Dendrocolaptes certhia (PERe; n = 1)	D. certhia (ECU; n = 1)	CytB	1.6	(2) + (6) x.5 =	4)	Aleixo, 2002. Auk 119:621-640 / Irestedt et al. 2004. J. Avian Biol. 35:280-288
Elaenia albiceps albiceps (BOL, n=1)	E. a. griseogularis (ECU; n=1)	ND2	0.95	(2) + (15) x.5=	8.5)	Rheindt et al.; 2008. BMC Evol. Biol. 8:193
Elaenia chiriquensis (nwECU; n=1)	E. chirquensis (nBRA, BOL; n=6)	ND2	3.8	0.5 + (18) x.5=	8.75	Rheindt et al.; 2008. BMC Evol. Biol. 8:193
Elaenia cristata (BOL; n=1)	E. cristata (GUY; n=2)	ND2	0.8	5 + (15) x.5=	5)	Rheindt et al.; 2008. BMC Evol. Biol. 8:193
Elaenia dayi (VEN; n=1)	E. obscura [part] (eBRA; n=1)	ND2	4.6	4 + (23) x.5=	9.5)	Rheindt et al.; 2008. BMC Evol. Biol. 8:193
Elaenia fallax fallax (JAM; n=1)	E. f. cherriei (DR; n=2)	ND2	5.3	16 + 17.5 x.5=	16.75	Rheindt et al.; 2008. BMC Evol. Biol. 8:193	Island
Elaenia flavogaster (BOL, eBRA; n=3)	E. flavogaster (GUY, TRIN, STV; n=3)	ND2	1.2	(21) + (5.5) x.5=	13.25)	Rheindt et al.; 2008. BMC Evol. Biol. 8:193
Elaenia martinica (CAY; n=1)	E. martinica (PR, STV; n=3)	ND2	1.4	18.5 + 15 x.5=	16.75	Rheindt et al.; 2008. BMC Evol. Biol. 8:193	Island
Elaenia spectabilis (BOL, PER, ARG; n=5)	E. spectabilis (eBRA; n=3)	ND2	1.1	(18.5) + (21) x.5=	19.75	Rheindt et al.; 2008. BMC Evol. Biol. 8:193
Empidonax affinis (all, n = 17)	E. oberholseri (all; n = 26)	ND2	5.5	22 + 49 x.5 =	35.5	Johnson and Cicero, 2002. Molecular Ecology, 11:2065-2081 / Klicka, unpublished data
Empidonax alnorum (all, n = 4)	E. traillii (all, n = 6)	ND2	6.3	39 + 50.5 x.5 =	44.75	Johnson and Cicero, 2002. Molecular Ecology, 11:2065-2081 / Klicka, unpublished data
Empidonax atriceps (all, n = 2)	E. fulvifrons (all, n = 9)	ND2	4.6	20 + 9.5 x.5 =	14.75	Johnson and Cicero, 2002. Molecular Ecology, 11:2065-208 / Klicka, unpublished data
Empidonax flavescens (PAN, CR; n = 4)	E. flavescens (GUA, HON; n = 6)	ND2	1.2	15.5 + 9.5 x.5 =	12.5	Klicka, unpublished data
Empoidonax difficilis insulicola (Channel Isl;.; n = 2)	E. difficilis (MEX, Baja S; n = 4)	ND2	0.8	33.5 + 23.5 x.5 =	28.5	Johnson and Cicero, 2002. Molecular Ecology, 11:2065-2081 / Klicka, unpublished data
Formicivora rufa (BOL; n=2)	F. rufa (eBRA; n=4)	CytB	1.6	2 + (11) x.5=	4.5)	Bates et al.; 2003. Studies on Neotropical Fauna & Environment 38:87-94
Geositta cunicularia cunicularia (CHI; n=3)	G. c. georgei (PER; n=1)	ND2	3.4	(39.5) + (16) x.5=	27.75)	Cheviron et al.; 2005. Auk 122:158-174
Geothlypis aequinoctialis (BOL; n = 1)	G. aequinoctialis (PAR; n = 1)	ND2	1	(18)/(25) x.5 =	21.5)	Escalante et al. 2009. MP&E 53:668-678
Geothlypis aequinoctialis (CR, n = 2)	G. semiflava (CR, n =1)	ND2	0.5	10 + 9 x.5 =	9.5	Escalante et al. 2009. MP&E 53:668-678
Geothlypis aequinoctialis (PER; n = 1)	G. aequinoctialis (ECU; n = 2)	ND2	0.6	(7) + (4) x.5 =	5.5)	Klicka et al., unpublished
Geothlypis aequinoctialis (VEN; n = 2)	G. aequinoctialis (BRAnc; n = 2)	ND2	1.4	7 + 1 x.5 =	4	Klicka et al., unpublished
Geothlypis poliocephala (MX. Yuc, Tab, VC; n = 3)	G. poliocephala (MX Morelos; n = 1)	ND2	1.3	19 + 19 x.5 =	19	Escalante et al. 2009. MP&E 53:668-678
Geothlypis rostrata (BAH,Andros/Eleuthera; n = 15)	G. rostrata (BAH, Abaco, G. Bahama; n = 15)	ND2	0.3	25 + 26.5x.5 =	25.75	Klicka et al., unpublished
Glyphorhynchus spiurus (eBRA; n= 8)	G. spiurus (seBRA; n=4)	CytB	4.4	(12.5) + (12.5) x.5=	12.5)	Marks et al.; 2002. Mol. Phyl. & Evol. 24:153-167
Glyphorhynchus spiurus (eECU; n= 4)	G. spiurus (ePER; n=11)	CytB	4.6	(3) + (8.5) x.5=	5.75)	Marks et al.; 2002. Mol. Phyl. & Evol. 24:153-167
Glyphorhynchus spiurus (MX, CR, PAN, VEN; n= 10)	G. spiurus (wECU, PAN; n= 4)	CytB	1.3	8.5 + 3 x.5=	5.75	Marks et al.; 2002. Mol. Phyl. & Evol. 24:153-167
Gymnostinops [Psarcolius] bifasciatus (PER, BOL; n = 4)	G. [P.] bifasciatus (BRAne; n = 1)	ND2	0.6	(16) + (5) x.5 =	10.5)	Price and Lanyon. 2004. Behavioral Ecol. 15:485-497
Gypopsitta aurantiocephala (n = 4)	G. vulturina (n = 5)	ND2	1.6	(4) + (8) x.5 =	6)	Ribas et al. 2005. J. Biogeography 32:1409-1427
Gypopsitta coccinicollaris (n = 3)	G. haematotis (n = 2)	ND2	2.8	12.5 + 5.5 x.5 =	9)	Ribas et al. 2005. J. Biogeography 32:1409-1427
Haemorhous purpureus (USe; n = 12)	H. purpureus (Usw; n = 4)	ND2	3.7	50 + 38 x.5 =	44	Smith et al. 2013. MP&E 66:1055-1059
Henicorhina leucosticta (MX, SE; n = 8)	H. leucosticta (MX, E (of Tehuantepec); n = 5)	ATPase	1.4	16 + 19 x.5=	17.5	Perez et al. unpublished
Henicorhina leucophrys (COL [Santander]; n = 3)	H. leucophrys (COL, [Cundinamarca]; n = 6)	ATPase	1.7	7+ 5 x.5=	6	Perez et al. unpublished
Henicorhina leucophrys (COL SW, [Cauca]; n = 4)	H. leucophrys (COL S, ECU N [Napo]; n = 12)	ATPase	2.5	3.5 + 0 x.5=	1.75	Perez et al. unpublished
Henicorhina leucophrys (CR, PAN w; n = 16)	H. leucophrys (PAN w; n = 2)	ATPase	1	9 + 8 x.5 =	8.5	Perez et al. unpublished
Henicorhina leucophrys (ECU [Manabi]; n = 4)	H. leucophrys (ECU [Pichincha]; n = 4)	ATPase	0.9	(1) + (.5) x.5=	.75)	Perez et al. unpublished
Henicorhina leucophrys (ECU S [Azuay]; n = 3)	H. leucophrys (ECU N [Pichincha]; n = 6)	ATPase	2.2	(2.5) + .5 x.5=	1)	Perez et al. unpublished
Henicorhina leucophrys (ECU SE, PER NE; n = 12)	H. leucophrys (ECU, M. Santiago; n = 3)	ATPase	1.4	(6) + (2) x.5	2)	Perez et al. unpublished
Henicorhina leucophrys (MX [Oaxaca S]; n= 2)	H. leucophrys (MX [Guerrero]; n = 2)	ATPase	1.1	16 + 18 x.5 =	17	Perez et al. unpublished
Henicorhina leucophrys (MX [Oaxaca]; n = 4)	H. leucophrys (MX E; n = 16)	ATPase	2.9	19 + 16 x.5=	17.5	Perez et al. unpublished
Henicorhina leucophrys (PER [Pasco]; n = 4)	H. leucophrys (PER [Cuzco]; n = 4)	ATPase	3.6	(10) + (14) x.5=	12)	Perez et al. unpublished
Henicorhina leucophrys (VEN [Falcon]; n = 3)	H. leucophrys (VEN [Yaracuy]; n = 3)	ATPase	6.2	10.5 + 10 x.5=	10.25	Perez et al. unpublished
Henicorhina leucophrys (VEN, [Merida]; n = 3)	H. leucophrys (COL, [Cundinamarca]; n = 1)	ATPase	5.6	7 + 9 x.5=	8	Perez et al. unpublished
Henicorhina leucophrys bangsii (COL [Magdalena]; n = 2)	H. leucophrys (VEN [Zulia]; n = 3)	ATPase	3.6	11.5 + 9 x.5=	10.25	Perez et al. unpublished
Henicorhina leucoptera (ECU S; n= 5)	H. leucoptera (PER [S. Martin]; n = 6 )	ATPase	2	(2) + (7.5) x.5=	4.75)	Perez et al. unpublished
Henicorhina leucosticta (COL [Caqueta]; n = 4)	H. leucosticta (VEN, GUY; n = 5)	ATPasee	2.7	0 + 6 x.5=	3	Perez et al. unpublished
Henicorhina leucosticta (COL W; n = 4)	H. leucosticta (COL; n = 1)	ATPase	4.3	5 + 6 x.5=	5.5	Perez et al. unpublished
Henicorhina leucosticta (PAN; n = 16)	H. leucosticta (NIC, CR, [Guanacaste]; n = 6)	ATPase	1.2	9 + 12 x.5=	10.5	Perez et al. unpublished
Hypocnemis cantator cantator (GUY [Iwokrama Mtns], n = 1)	H. c. cantator (GUY [potaro-Siparuni] ; n = 1)	ND2	1.3	4 + 5 x.5 =	4.5	Tobias et al. 2008. Science 319:901
Hypocnemis cantator collinsi (n = 3)	H. c. subflava (n = 1)	ND2	3.7	(9) + (12) x.5 =	10.5	Tobias et al. 2008. Science 319:901
Hypocnemis cantator implicata (n = 2)	H. c. affinis (n = 4)	ND2	0.9	0 + (15) x.5 =	7.5)	Tobias et al. 2008. Science 319:901
Hypocnemis cantator saturata (ECU, n = 2)	H. c. saturata (PER; n = 2)	ND2	1.1	(4) + (4) x.5 =	4)	Tobias et al. 2008. Science 319:901
Icteria virens (USw; n = 7)	I. virens (USe; n = 34)	ATPase	1.8	44 + 34.5 x.5 =	39.25	Lovette, et al., 2004. Cons. Bio. 18:156-166
Icterus cayanensis pyrrhopterus/tibialis (n = 10)	I. c. cayanensis & I. chrysocephalus (n = 6)	ND2	1	19 + (2.5) x.5 =	10.75	D'Horta et al. 2008. Biol. J. Linn. Soc. 95:583-597
Junco phaeonotus (GUA; n = 19)	J. phaeonotus/hyemalis (n = 243)	CR	0.8	15 + 42 x.5 =	28.5	Mila et al. 2007. 274:2653-2660
Lepidocolaptes squamatus squamatus (n = 1)	L. s. wagleri (n = 1)	CytB	1.7	(10) + (12) x.5 =	11)	Garcia-Moreno et al.., 1998. Studies in Neotropical Env. 32:164-173
Lepidocolaptes affinis (MX, GUA, HON, ELSAL; n = 70)	L. affinis (CR; n = 10)	CytB	1.4	20 + 10 x.5 =	15	Arbelaez-Cortes et al. 2010. MP&E 57:658-668
Lepidocolaptes affinis [lachrymiger] (ECU?; n = 1)	L. affinis [lachrymiger] (BOL; n = 1)	CytB	1.1	0 + (17) x.5 =	8.5)	Irestedt et al. 2004. J. Avian Biol. 35:280-288 /Weir et al. PNAS 2009. 106:21737-21742
Lepidocolaptes souleyetii (PER, VEN, n = 5)	L. souleyetii (NIC; n = 1)	CytB	2.6	5 + 12 x.5 =	8.5	Garcia-Moreno et al.., 1998. Studies in Neotropical Env. 32:164-173 / Weir et al. PNAS 2009. 106:21737-21742
Leucosticte arctoa (OW; > 50)	L. tephrocotis/atrata/australis (NW; n == 117)	ND2	3.4	55+ 50 .5 x.5 =	52.75	Drovetski et al. 2009. MP & E 50:437-445
Lysurus crassirostris (COLnw; n = 1)	L. castaneiceps (ECU, PER, COL; n = 2)	ND2	4.5	9 + (10.25) x .5=	.85)	Cadena et al. 2007. MP&E 44:993-1016
Microbates cinereiventris (ECU; n = 5)	M. cinereiventris (PAN; n = 4)	ND2	6.1	2 + 10 x.5 =	6	Klicka and Smith, unpublished
Mionectes mcconnelli (VEN; n = 1)	M. mconnelli (BRAe; n = 2)	ND2	1.5	0 + (2) x.5 =	1)	Miller et al.; 2008. Proc. Roy Soc., B 275:1133-1142
Mionectes oleagineus (PAN e , PER, VEN, BRA n = 38)	M. oleagineus ( TRI, VEN coast; n = 6)	ND2	0.8	(5.5) + 10 x.5 =	2.25	Miller et al.; 2008. Proc. Roy Soc., B 275:1133-1142
Mionectes oleagineus (PAN sw; n = 8)	M. oleagineus (PAN c; n = 26)	ND2	1.2	9 + 7 x.5 =	8	Miller et al.; 2008. Proc. Roy Soc., B 275:1133-1142
Mionectes oleagineus (PAN, CR, NIC, HON, GUA, MX; n= 53)	M. oleagineus (wECU; n=4)	ND2	3	15.5 + (.5) x.5=	7.5	Miller et al.; 2008. Proc. Roy Soc., B 275:1133-1142
Mionectes oleagineus (PER, BOL, GUY; n=12)	M. oleagineus (BRAe; n=1)	ND2	1.7	(5.5) + (15) x.5=	10.25	Miller et al.; 2008. Proc. Roy Soc., B 275:1133-1142
Mionectes olivaceus (PANw; n = 4)	M. olivaceus (PANe [Darien]; n = 2)	ND2	1.8	10 + 8 x.5=	9	Miller et al.; 2008. Proc. Roy Soc., B 275:1133-1142
Myadestes coloratus (PAN [S. de Maje]; n = 2)	M. coloratus (PAN [C. Pirre]; n = 5)	ATPase	2.4	9 + 8 x.5 =	8.5	Miller et al., 2007. Auk, 124:868-885
Myadestes genibarbis (Martinique; n = 3)	M. genibarbis (St. Lucia; n = 3)	ATPase	0.4	15 + 14 x.5 =	14.5	Miller et al., 2007. Auk, 124:868-885
Myadestes occidentalis (MX [Pacific]; n = 3)	M. occidentalis (MXe, GUA; n = 3)	ATPase	1	22 + 19.5 x.5 =	20.75	Miller et al., 2007. Auk, 124:868-885
Myadestes ralloides (BOL; n = 2)	M. ralloides (PER [C Andes]; n = 3)	ATPase	1.7	(12) + (10) x.5 =	11)	Miller et al., 2007. Auk, 124:868-885
Myadestes ralloides (ECU w; n = 7)	M. ralloides (ECU, PER e; n = 2)	ATPase	2.7	0 + (6.5) x.5 =	3.25)	Miller et al., 2007. Auk, 124:868-885
Myiarchus phaeocephalus [part] (ECU; n=1)	M. panamensis (PAN, CR; n=3)	Atpase	4.1	(5) + 5 x.5=	0.5	Joseph et al.; 2004. Mol. Phy. & Evol. 31:139-152
Myiarchus antillarum (PR; n=2)	M. oberi (ANT; n=3)	Atpase	2	17.5 + 15.5 x.5=	16.5	Joseph et al.; 2004. Mol. Phy. & Evol. 31:139-152	Island
Myiarchus sagrae/stolidus (CUB, JAM; n=3)	M. sagrae/stolidus (DOM, BAH; n=4)	Atpase	0.7	20 + 22.5 x.5=	21.25	Joseph et al.; 2004. Mol. Phy. & Evol. 31:139-152
Myiarchus swainsoni [part] (GUY, ARG, BOL, PAR; n=5)	M. s. "phaeonotus/pelzelni" (GUY; n=2)	Atpase	2.6	(16.5) + 5 x.5=	5.75)	Joseph et al.; 2004. Mol. Phy. & Evol. 31:139-152
Myiarchus tuberculifer (ECU; n=1)	M. tuberculifer (US, NIC, HON, PAN, MX; n=24)	Atpase	1	(2) + 20.5 x.5=	9.25	Joseph et al.; 2004. Mol. Phy. & Evol. 31:139-152 / Klicka, unpublished data
Myiarchus tuberculifer atriceps (ARG; n=2)	M. t. tuberculifer (GUY, ECU; n=2)	Atpase	1.8	(14) + 4.5 x.5=	4.5)	Joseph et al.; 2004. Mol. Phy. & Evol. 31:139-152
Myiarchus tyrannulus (US, MX, HON; n=3)	M. tyrannulus (VEN, PAR, BOL, BRA; n=7)	Atpase	1.5	23.5 + (10) x.5=	6.75	Joseph et al.; 2004. Mol. Phy. & Evol. 31:139-152 / Klicka, unpublished data
Myiarchus venezuelensis (VEN; n=1)	M. ferox [part] ECUe; n=1)	Atpase	0.5	10.5 + 0 x.5=	5.25	Joseph et al.; 2004. Mol. Phy. & Evol. 31:139-152
Myioborus castaneocapillus maguirei (VENs; n = 2)	M. cardonai (VENe; n = 1)	ND2	0.2	1.5 + 7 x.5 =	4.25	Perez, J. L. 2005. MP & E 37:511-528
Myioborus melanocephalus (BOLw; n = 2)	M. melanocephalus (PERc; n = 3)	ND2	0.6	(10) + (14) x.5 =	12)	Perez, J. L. 2005. MP & E 37:511-528
Myioborus melanocephalus (ECUs; n =2)	M. ornatus (VEN, COL; n = 6)	ND2	0.65	(16) + 6 x.5 =	5)	Perez, J. L. 2005. MP & E 37:511-528
Myioborus minatus comptus (CR; n = 1)	M. m. intermedius (MEXse; n = 11)	ND2	1.1	11.5 + 16 x.5 =	13.75	Perez, J. L. 2005. MP&E 37:511-528
Myioborus miniatus ballax (PANe; n = 1)	M. m. verticalis (ECU, PER, BOL; n = 5)	ND2	1.6	9/(12)	1.5)	Perez, J. L. 2005. MP & E 37:511-528
Oporornis tolmiei (US; n = 16)	O. tolmiei (MX ne; n = 2)	ND2	0.91	48 + 26 x.5 =	37	Klicka et al., unpublished
Oreothlypis ruficapilla (USw; n = 9)	O. ruficapilla (USe; n = 18)	ATPase	2	44 + 45.5 x.5 =	44.75	Lovette, et al., 2004. Cons. Bio. 18:156-166
Passerculus sandwichensis (MX; n = 42)	P. sandwichensis (US; n = 18)	ND2	1.5	25 + 52 x.5 =	38.5	Zink et al., 2005. Condor 107:21-28
Passerella iliaca ("red"; n = 4)	P. iliaca ("Slate colored"; n = 4)	ND2	1.4	59 + 45.5 x.5 =	52.25	Zink and Weckstein, 2003. Auk 120:522-527
Passerina versicolor (MXc; n = 3)	P. versicolor (MXw; n = 3)	ND2	1.3	26 + 23 x.5 =	14.5	Bryson, et al. 2013. J. of Biogeo. 41:587-599
Perisoreus canadensis (CAN+; n= 42)	P. canadensis (N Rockies; n=23)	ND2	1.4	55.5 + 42.5 x.5=	48.75	va Els et al., 2012. MP & E 63:456-465
Phaeothlypis rivularis (GUY; n = 2)	P. rivularis (PAR; n = 1)	ATPase	5	4 + (20) x.5 =	8)	Lovette, I. 2004. MP&E 32:512-523
Phaeothlypis fluvicauda (ECUw; n = 4)	P. fluvicauda (ECUe; n = 1)	ATPase	4.7	2 + (1) x.5 =	0.5	Lovette, I. 2004. MP&E 32:512-523
Pharomachrus auriceps (PER; n=2)	P. pavoninus (ECU, PER; n=3)	ND2	6	(3.5) + (7) x.5=	5.25	DaCosta & Klicka; 2008. Mol. Ecol. 17:1328-1343
Pharomachrus fulgidus (COL; n=1)	P. antisianus (PER, BOL; n=2)	ND2	0.1	10.25 + (3.5) x.5 =	3.35	DaCosta & Klicka; 2008. Mol. Ecol. 17:1328-1343
Pheucticus aureoventris (COLsw; n = 1)	P. aureoventris (COLn; n = 2)	ND2	1.7	0 + 6.5 x.5 =	3.25	Pulgarin et al., 2013. MP&E. 69:1222-1227
Pheucticus chrysogaster (ECUsw; n = 2)	P. chrysogaster (PER; n = 5)	ND2	1.3	(4) + (10) x.5 =	7)	Pulgarin et al., 2013. MP&E. 69:1222-1227
Pheucticus melanocephalus (MEXs; n = 3)	P. melanocephalus (US[Rockies]); n = 13)	ND2	1.7	16.75 + 35 x.5=	25.9	van Els et al., 2014. Mol. Phy. & Evol. 78:148-159
Pheucticus tibialis (PAN, n = 1)	P. tibialis (CR; n = 1)	ND2	0.7	11 + 8 x.5 =	9.4	Pulgarin et al., 2013. MP&E. 69:1222-1227
Pinicola enucleator (USs; n = 12)	P. enucleator (USn; n = 21)	ND2	2.5	43 + 58 x.5 =	50.5	Drovetski et al. 2010. J. Biogeography 37:696-706
Pionus chalcopterus chalcopterus (COL, VEN; n = 1)	P. c. cyanescens (ECU, n = 2)	ND2	0.6	5.5 + (2) x.5 =	1.8	Ribas et al. 2007. Proc. Roy soc. London, 274:2399-2408
Pionus m. menstruus (Amazonia; n = 4)	P. m. rubigularis (VEN w, COLw, PAN; n = 4)	ND2	0.8	(1) + 5 x.5 =	2	Ribas et al. 2007. Proc. Roy soc. London, 274:2399-2408
Pionus maximiliana (BRA E; n = 2)	P. maximiliana (BRAw, PAR, BOL; n = 4)	ND2	0.9	(21) + (22) x.5 =	21.5	Ribas et al. 2007. Proc. Roy soc. London, 274:2399-2408
Pionus sordidus (VEN w [S. Santa Marta]; n = 1)	P. sordidus (VEN N; n = 4)	ND2	2.9	11 + 10.5 x.5 =	10.75	Ribas et al. 2007. Proc. Roy soc. London, 274:2399-2408
Pionus tumultuosus tumultuosus (n = 1)	P. t. seniloides (n = 2)	ND2	2.8	(13.5) + .5 x.5 =	6.5)	Ribas et al. 2007. Proc. Roy soc. London, 274:2399-2408
Poecile carolinensis (US e; n = 28)	P. carolinensis (US w; n = 24)	CytB	2.7	33 + 34 x.5 =	33.5	Gill et al., 2005, Auk 121:121-143 / Gill et al. 1993. Evolution 47:195-212
Poecile gambeli gambeli (n = 5)	P. g. baileyi (n = 5)	CytB	4.8	44 + 42 x.5 =	43	Gill et al., 2005, Auk 121:121-143 / Gill et al. 1993. Evolution 47:195-212
Poecile rufescens (n = 10)	Poecile hudsonicus (n = 37)	CytB	3.3	48.5 + 56.5 x.5 =	52.5	Gill et al., 2005, Auk 121:121-143 / Gill et al. 1993. Evolution 47:195-212
Poecile sclateri (MXn; n = 4)	P. sclateri (MXs; n = 4)	RFLP	1.2	27 + 19 x.5 =	23	Gill et al., 2005, Auk 121:121-143 / Gill et al. 1993. Evolution 47:195-212
Polioptila albiloris (MEX; n = 6)	P. albiloris (ElSal, NIC, GUA, CR; n = 10)	ND2	1.6	16 + 12.5 x.5 =	14.25	Klicka and Robbins, unpublished data
Polioptila caerulea (US [CO. NV, NM]; n=17)	P. caerulea (MEX Yuc Pen.; n=6)	ND2	0.8	34 + 19 x.5 =	26.5	Klicka and Robbins, unpublished data
Polioptila caerulea (USe; n = 4)	P. caerulea (USsw; n = 1)	ND2	1.1	36 + 35 x.5 =	35.5	Klicka and Robbins, unpublished data
Polioptila melanura (n = 17)	P. californica (n = 7)	ND2	5.7	28.25 + 29.5 x.5 =	28.9	Klicka and Robbins, unpublished data
Polioptila plumbea (BRAne, GUY; n = 8)	P. plumbea (PERne; n = 2)	ND2	8	2.5 + (3) x.5 =	0.5)	Klicka and Robbins, unpublished data
Polioptila plumbea (PAN, CR, HON, MEX; n=12)	P. plumbea (PAN, Isla Coiba; n=1)	ND2	3.5	15 + 8 x.5=	12.5	Klicka and Robbins, unpublished data
Polioptila plumbea (VENe; n = 2)	P. plumbea (BRAn, GUY; n = 4)	ND2	1.5	10 + 3 x.5 =	6.5	Klicka and Robbins, unpublished data
Polioptila schistaceigula (ECU; n = 1)	P. schistaceigula (PAN; n = 1)	ND2	1.4	0 + 8 x.5 =	4	Klicka and Robbins, unpublished data
Progne subis subis (US e; n = 6)	P. s. arboricola US w; n = 4)	CytB	2.2	40 + 33.5 x.5 =	36.75	Moyle et al. 2008. Wilson J. Ornithol. 120:683-691.
Psarocolius angustifrons alfredi (PERs; n = 3)	P. a. angustifrons (PERne; n = 1)	ND2	0.5	(8) + (3) x.5 =	5.5)	Price and Lanyon. 2004. Behavioral Ecol. 15:485-497
Psarocolius decumanus melanterus (PAN; n = 1)	P. d. maculosus (BOL; n = 1)	ND2	1.8	9 + (15) x.5 =	3)	Price and Lanyon. 2004. Behavioral Ecol. 15:485-497
Pselliophorus leuteoviridis (1)	Pselliophorus tibialis (1)	ND2	0.2	9 + 9.5 x.5 =	9.25	Klicka et al. 2014. MP&E 77:177-182
Pteroglossus aracari (BRAn; n = 2)	P. a. atricollis (GUY; n = 2)	ND2	1.4	(5) + 5 x.5 =	0	Patel et al. 2011. MP&E 58:105-115
Pteroglossus azara (BRAw; n = 2)	P. azara/mariae (BRA, PER, BOL; n = 6)	ND2	1.45	(4) + (8) x.5 =	6)	Patel et al. 2011. MP&E 58:105-115
Pteroglossus bitorquatus reichenowi (n = 1)	P. b. sturmi (n = 1)	ND2	1.1	(12) + (3) x.5 =	7.5	Patel et al. 2011. MP&E 58:105-115
Pteroglossus inscriptus humboldtii (n = 3)	P. i. inscriptus (n = 2)	ND2	0.9	(15) + (9) x.5 =	12)	Patel et al. 2011. MP&E 58:105-115
Pyrrhura "leucotis-griseipectus" (n = 8)	P. "amazonum-snethlageae" (n = 13)	Cytb	1.1	(9) + (13.5) x.5 =	11.25)	Ribas et al. 2006. Auk 123:660-680
Pyrrhura perlata perlata (BRA; n = 2)	P. p. lepida (BRA; n = 2)	Cytb	1.5	(1) + (3) x.5 =	2)	Ribas et al. 2006. Auk 123:660-680
Pyrrhura picta picta (BRA, GUY; n = 7)	P. leucotis emma (Captives [VENn] ; n = 5)	Cytb	1	5.5 + 9.5 x.5 =	7.5	Ribas et al. 2006. Auk 123:660-680
Quiscalus major (TX, LA, FL; n = 15)	Q. mexicanus (US e, MX c, HON, Pan; n = 15)	ND2	1.1	32.5 + 20 x.5 =	21.25	Powell et al. 2008. Condor 110:718-728 / DaCosta et al. 2008. Condor 110:170-177
Ramphastos ambiguous (n = 1)	R. swainsonii (n = 2)	ND2	1.1	0 + 6.5 x.5 =	3.25	Patane et al. . MP& E 2009 53:923-934
Ramphastos tucanus (GUY; n = 1)	R. tucanus & R. cuvieri (BRA, PER, BOL; n = 5)	ND2	0.4	(4.5) + (5.5) x.5 =	5.0)	Patane et al. . MP& E 2009 53:923-934
Ramphastos v. vitellinus ((n = 3)	R. v. ariel & R. culminatus (paraphyletic assemblage; n = 10)	ND2	0.1	3 + (5.5) x.5 =	.75)	Patane et al. . MP& E 2009 53:923-934
Ramphocaenus melanurus (BRAn; n = 1)	R. melanurus (BRAw; n = 4)	ND2	4.9	(2) + (9) x.5 =	5.5)	Klicka, unpublished data
Ramphocaenus melanurus (C Amw; GUA; n = 3)	R. melanurus (C Ame; n = 10)	ND2	2.3	15 + 15 x.5 =	15	Klicka and Smith, unpublished
Ramphocaenus melanurus (GUY; n = 5)	R. melanurus (BRAne; n = 4)	ND2	5.5	5 + (10) x.5 =	2.5)	Klicka and Smith, unpublished
Saltator atriceps (all, n = 12)	S. atripennis (all, n = 4)	ND2	7.1	2 + 15.5 x.5 =	8.75	Chaves et al, J. of Biogeo. 40:2180-2190
Saltator aurantiirostris (BOL, ARG; n = 7)	S. aurantiirostris (PER; n = 3)	ND2	4.4	(14) + (24) x.5 =	19)	Chaves et al. 2013. J. of Biogeo. 40:2180-2190
Saltator coerulescens (BRA, ECU; n = 4)	S. coerulescens (BOL, ARG; n = 4)	ND2	4	0.5 + (6.5) x.5 =	3)	Chaves et al. 2013. J. of Biogeo. 40:2180-2190
Saltator coerulescens (MX; n = 4)	S. coerulescens (MX E, CA; n = 8)	ND2	3.4	20 + 15.5 x.5 =	17.75	Chaves et al. 2013. J. of Biogeo. 40:2180-2190
Saltator grossus (ECU S; n = 3)	S. grossus (NIC, PAN, ECU N; n = 5)	ND2	2.3	(4) + 6 x.5 =	1	Chaves et al, J. of Biogeo. 40:2180-2190
Saltator maximus (cis Andes; n = 20)	S. maximus (Trans Andes; n = 3)	ND2	2.7	(1.75 + (5) x.5 =	1.5)	Chaves et al. 2013. J. of Biogeo. 40:2180-2190
Saltator similis (BRA; n = 3)	S. albicollis (Lesser Antilles; n = 7)	ND2	1.4	(20) + 13 x.5 =	3.5)	Chaves et al. 2013. J. of Biogeo. 40:2180-2190
Saltator striatipectus (PAN, VEN; n = 5)	S. striatipectus (PER, ECU; n = 5)	ND2	3.4	9.5 + (2.5) x.5 =	3.5	Chaves et al. 2013. J. of Biogeo. 40:2180-2190
Saltatricula multicolor (n = 2)	Saltator atricollis (n = 3)	ND2	9.4	(8.5) + (18) x.5 =	13.5	Chaves et al, J. of Biogeo. 40:2180-2190
Schiffornis turdina (BRA, PER; n=4)	S. turdina (BOL, sBRA; n=2)	CytB	2.8	(12) + (13.5) x.5=	12.75)	Nyari; 2007. Mol. Phy. & Evol. 44:154-164
Schiffornis turdina (MX, CR, PAN; n=7)	S. turdina (ECUw; n=3)	CytB	0.4	15.5 + (2) x.5	6.75	Nyari; 2007. Mol. Phy. & Evol. 44:154-164
Schiffornis turdina (PERs, BOL; n=2)	S. turdina (PERn, ECUe, VEN; n=4)	CytB	1.9	(11.5) + (4) x.5=	7.75)	Nyari; 2007. Mol. Phy. & Evol. 44:154-164
Septophaga petechia (USsw; n = 14)	S. petechia (USe; n = 45)	CR	3	52.5 + 48 x .5 =	50.25	Boulet and Gibbs, 2006. Mol. Ecol. 15:2505-2525
Setophaga coronata goldmani (n = 28)	S. c. nigrifrons (n = 16)	ATPase	1.1	29.5 + 15 x.5 =	22.25	Mila et al. 2007, Mol. Ecol. 16:159-173
Setophaga nigrescens (USn; n = 6)	S. nigrescens (USs; n = 5)	ATPase	1	53 + 30 x.5 =	41.5	Lovette et al., 1999. Mol. Ecol. 8:1431-1441
Sittasomus griseicapillus (BRAe; n = 1)	S. griseicapillus (ECU?; n = 1)	CytB	3.8	(8) + 0 x.5 =	4)	Irestedt et al. 2004. J. Avian Biol. 35:280-288 /Weir et al. PNAS 2009. 106:21737-21742
Synallaxis albescens (BOL; n=1)	S. albescens (eBRA; n=1)	CytB	2	2 + (11) x.5=	4.5)	Bates et al.; 2003. Studies on Neotropical Fauna & Environment 38:87-94
Troglodytes aedon musculus (PER, Junin, Pasco; n = 2)	T. a. musculus (PER, Cuzco, Puno; n = 6)	ND2	1.1	(9.5) + (13) x.5 =	11.25)	Klicka, unpublished data
Thamnophilus caerulescens dinelli/connectens (wBOL; n=69)	T. c. paraguayensis (eBOL; n=30)	Cytb	1.1	(22) + (18) x.5=	20)	Brumfield; 2005. Auk 122:414-432
Thamnophilus palliatus palliatus (BOL; n=1)	T. p. tenuepunctatus (ECU; n=1)	CytB	0.7	(11) + (.5) x.5=	5.75)	Brumfield & Edwards; 2007. Evolution (Feb) 346-361
Thamnophilus punctatus ambiguus (eBRA; n=14)	T. p. ambiguus (eBRA; n=8)	CytB	0.8	(14.75) + (19) x.5=	16.9	Lacerda et al.; 2007. Braz. J. Biol. 67:873-882
Thamnophilus punctatus atrinucha (PAN; n=1)	T. bridgesi (CR; n=1)	CytB	5.6	7.75 + 9.25 x.5=	8.5	Brumfield & Edwards; 2007. Evolution (Feb) 346-361
Thamnophilus punctatus pelzelini (eBRA; n=6)	T. p. pelzelini (eBRA; n=16)	CytB	0.5	(19) + (18.5) x.5=	18.75)	Lacerda et al.; 2007. Braz. J. Biol. 67:873-882
Tityra cayana (BOL, n = 1)	T. cayana (ARGe, n = 1)	ND2	2.2	(11) + (27) x.5=	19)	Barber and Rice, 2007. The Auk 124:1317 - 1329
Tityra inquisitor (PER, BOLw; n = 4)	T. inquisitor (ECUw; n = 2)	Cytb	2.5	(11) + 1 x.5=	5)	Burney, unpub. Diss; Burney and Brumfield 2009. Am. Nat. 174:358-368
Tityra semifasciata (BOL, PER; n = 10)	T. semifasciata (ECUw; n = 3)	Cytb	0.91	1 + (9) x.5 =	4)	Burney, unpub. Diss; Burney and Brumfield 2009. Am. Nat. 174:358-368
Troglodytes aedon brunneicolis (MX S; n = 8)	T. a. brunneicollis (MX N&E; n = 12)	ND2	2.6	17 + 24 x.5 =	15.5	Klicka, unpublished data
Troglodytes aedon musculus (ARG E; n = 1)	T. a. musculus (BOL, PAR, ECU E; n = 9)	ND2	1.4	(27) + (10) x.5 =	18.5	Klicka, unpublished data	Parana/Uruguay Rvier corridors
Troglodytes aedon musculus (BRA NE; n = 7)	T. a. musculus (BRA Amapa; n = 1)	ND2	1.2	2 + (9) x.5 =	3.5)	Klicka, unpublished data	Amazonian corridor
Troglodytes aedon musculus (HON, GUA; n = 4)	T. a. musculus (NIC; n = 2)	ND2	1.8	15 + 12 x.5 =	13.5	Klicka, unpublished data
Troglodytes aedon musculus (MX SE; n = 10)	T. a. beani (MX Isla Cozumel; n = 10)	ND2	0.9	19.5 + 20.5 x.5 =	20	Klicka, unpublished data
Troglodytes aedon musculus (PAN, isla Coiba; n = 2)	T. a. musculus (PAN; n = 6)	ND2	0.7	8 + 8.5 x.5 =	8.25	Klicka, unpublished data
Troglodytes aedon musculus (PER, Arequipa; n = 3)	T. a. musculus (ARG, Neuquen; n = 2)	ND2	3	(35) + (18) x.5 =	26.5)	Klicka, unpublished data
Troglodytes aedon musculus (St. Vincent; n = 3)	T. a. musculus (Grenada; n = 9)	ND2	1.8	13 + 12 x.5 =	12.5	Klicka, unpublished data
Troglodytes aedon musculus (VEN, BRA; n = 22)	T. a. musculus (Trinidad; n = 7)	ND2	0.7	8 + 10.5 x.5 =	9.25	Klicka, unpublished data
Troglodytes rufociliatus (MX, Chiapas; n = 1)	T. rufociliatus (GUA, Quetzaltenango; n = 1)	ND2	1.3	15 + 14 x.5 =	14.5	Klicka, unpublished data
Troglodytes rufulus (VEN, Bolivar; n = 1)	T. rufulus (VEN, Amazonas; n = 2)	ND2	4.3	6 + 5 x.5 =	5.5	Klicka, unpublished data
Troglodytes solstitialis (BOL, LaPaz; n = 1)	T. solstitialis (PER, Cuzco; n = 2)	ND2	1.8	(17) + (13) x.5 =	15)	Klicka, unpublished data
Troglodytes solstitialis (PER, Cajamarca; n = 2)	T. solstitialis (ECU, Napo, Carchi, n = 3)	ND2	1	(6) + 0 x.5 =	3)	Klicka, unpublished data
Troglodytes tanneri (Clarion Isl.; n = 2)	T. sissonii (Soccoro Isl.; n = 1)	ND2	2.5	18 + 19 x.5 =	18.5	Klicka, unpublished data
Trogon collaris (BOL, PER; n = 4)	T. collaris (GUY; n = 3)	ND2	3.3	4 + (6) x.5 =	1)	DaCosta & Klicka, 2008. Molecular Ecology 17:1328-1343
Trogon curucui (ECU, PER, BOL; n = 6)	T. curucui (BOL, PAR; n = 3)	ND2	1.5	(5) + (16.5) x.5 =	10.75)	DaCosta & Klicka, 2008. Molecular Ecology 17:1328-1343
Trogon elegans (MEX; n = 4)	T. elegans (ElSAL; n = 3)	ND2	3.3	24.25 + 13.25 x.5 =	18.75	DaCosta & Klicka, 2008. Molecular Ecology 17:1328-1343
Trogon melanocephalus (HON; n = 7)	T. citreolus (MEX S, n = 2)	ND2	0.8	19.75 + 15 x.5 =	17.4	DaCosta & Klicka, 2008. Molecular Ecology 17:1328-1343
Trogon melanurus (BOL, BRA, PER; n = 9)	T. melanurus (GUY; n = 2)	ND2	2.6	4 + (7.5) x.5 =	1.75)	DaCosta & Klicka, 2008. Molecular Ecology 17:1328-1343
Trogon melanurus (ECUw; n = 2)	T. massena (MEX, HON, PAN; n = 9)	ND2	4.4	(1) + 10 x.5 =	4.5	DaCosta & Klicka, 2008. Molecular Ecology 17:1328-1343
Trogon mexicana (MEX w; n = 4)	T. mexicana (MEX e; n = 10)	ND2	0.6	21.5 + 18.5	20	DaCosta & Klicka, 2008. Molecular Ecology 17:1328-1343
Trogon personatus ( COL, ECU; n = 3)	T. personatus (PER, ECU; n = 2)	ND2	1.4	8 + (10) x.5 =	1)	DaCosta & Klicka, 2008. Molecular Ecology 17:1328-1343
Trogon personatus (NIC, HON, PAN; n = 4)	T. aurantiiventris (PAN; n = 5)	ND2	1	12 + 9.75 x.5 =	10.9	DaCosta & Klicka, 2008. Molecular Ecology 17:1328-1343
Trogon personatus (VEN; n = 2)	T. personatus (GUY; n = 2)	ND2	1.5	8 + 4 x.5 =	6	DaCosta & Klicka, 2008. Molecular Ecology 17:1328-1343
Trogon rufus ( ECUw; n = 1)	T. rufus (PAN, HON; n = 6)	ND2	4.3	3 + 11.5 x.5 =	7.25	DaCosta & Klicka, 2008. Molecular Ecology 17:1328-1343
Trogon rufus (GUY; n = 2)	T. rufus (PER; n = 1)	ND2	1.3	(3) + 5 x.5 =	1	DaCosta & Klicka, 2008. Molecular Ecology 17:1328-1343
Trogon violaceus (ECU, PER, VEN; n = 4)	T. violaceus (BOL; n = 1)	ND2	2.2	(2.5) + (12) x.5 =	7.25)	DaCosta & Klicka, 2008. Molecular Ecology 17:1328-1343
Trogon viridis (PAN, ECU w; n = 3)	T. bairdii (PAN; n = 4)	ND2	3.9	11 + 3.5 x.5 =	7.25	DaCosta & Klicka, 2008. Molecular Ecology 17:1328-1343
Turdus leucomelas (BOL; n=2)	T. leucomelas (BRAe; n=3)	CytB	2	2 + (11) x.5=	4.5)	Bates et al.; 2003. Studies on Neotropical Fauna & Environment 38:87-94
Xenops minutus (PERe, BRAw; n = 9)	X. minutus (PERs, BOLw; n = 9)	Cytb	1.8	(7) + (15) X.5 =	11)	Burney, unpub. Diss; Burney and Brumfield 2009. Am. Nat. 174:358-368
Xiphorhynchus sussurans (Pan/NIC; n = 8)	X. sussurans (VEN; n = 17)	CytB	3	10 + 9 x.5 =	9.5	Aleixo; 2002. Auk 119:621-640, Klicka unpublished data
Xiphorhynchus elegans elegans (BOLse, BRAsw; n = 11)	X. e. elegans (BRAw; n = 6)	CytB	0.5	(15) + (9) x.5 =	12)	Aleixo, 2004. Evolution 58:1303-1317
Xiphorhynchus elegans juruanus (BOL, PER, BRAwnw; n = 24)	X. e. ornatus (PERn, ECU; n = 13)	CytB	1.4	(10) + (2) x.5 =	6)	Aleixo, 2004. Evolution 58:1303-1317
Xiphorhynchus erythropygius insolitus (PAN; n=2)	X. e. aequatorialis (ECU; n=1)	CytB	1.6	15 + 3 x.5=	9	Aleixo; 2002. Auk 119:621-640 / Irestedt et al. 2004. J. Avian Biol. 35:280-288
Xiphorhynchus flavigaster (MXw; n = 5)	X. flavigaster (Mxe, HON, GUA; n = 5)	CytB	1.6	20 + 14 x.5 =	17	Aleixo; 2002. Auk 119:621-640, Klicka unpublished data
Xiphorhynchus fuscus brevirostris (BRAe; n = 11)	X. f. fuscus (BRAe; n = 5)	CytB	1.5	(11) + (20) x.5 =	15.5)	Cabanne et al. 2008. MP&E 49:760-773
Xiphorhynchus guttatus eytoni (BRAn; n = 1)	X. guttatus (BOL, BRA; n = 11)	CytB	2.5	(5) + (10 ) x.5 =	7.5)	Aleixo; 2002. Auk 119:621-640, Klicka unpublished data
Xiphorhynchus ocellatus chunchotambo (PER; n=1)	X. o. brevirostris (BOL; n=1)	CytB	1.1	(4) + (12) x.5=	8	Aleixo; 2002. Auk 119:621-640
Xiphorhynchus pardalotus (BRA; n = 1)	X. ocellatus ocellatus (BRA; n = 1)	CytB	3.3	(3) + (2) x.5 =	2.5)	Aleixo; 2002. Auk 119:621-640
Xiphorhynchus picus extimus (PAN; n = 2)	X. p. picus (BRA; n = 4)	CytB	3	8 + (13) x.5 =	2.5)	Aleixo; 2002. Auk 119:621-640
Xiphorhynchus spixii (BRAsc; n = 10)	X. spixii (BRAn; n = 11)	CytB	0.9	(3) + (10) x.5 =	6.5	Aleixo, 2004. Evolution 58:1303-1317
Xiphorhynchus triangularis intermedius (PER; n = 2)	X. triangularis (ECU; n = 1)	CytB	4.5	(12) + (1) x.5 =	6.5)	Irestedt et al. 2004. J. Avian Biol. 35:280-288 / Aleixo; 2002. Auk 119:621-640
